# Supplementary material for: Deep Sequencing of Organ- and Stage-Specific microRNAs in the Evolutionarily Basal Insect Blattella germanica (L.) (Dictyoptera, Blattellidae)
Source: PLoS One. 2011 Apr 28;6(4):e19350. doi: 10.1371/journal.pone.0019350 (PMC3084283; doi:10.1371/journal.pone.0019350)
Supplement: Table S1 — Sequences and number of reads for known miRNA found in WB-6 and Ov-A libraries of Blattella germanica. (XLS) [file pone.0019350.s005.xls]

## Sheet: Table S1
Table S1. Sequences and number of reads for known miRNA found in WB-6 and Ov-A libraries of Blattella germanica
		Number of reads
miRNA	Sequence	WB-6	Ov-A
bge-miR-1	TGGAATGTAAAGAAGTATGGAG	6826964	246874
bge-let-7	TGAGGTAGTAGGTTGTATAGTT	32201	19103
bge-miR-31a	AGGCAAGATGTCGGCATAGCTGA	24822	16693
bge-miR-275	TCAGGTACCTGAAGTAGCGCGCG	13876	3971
bge-miR-276a	TAGGAACTTCATACCGTGCTCT	10339	1525
bge-miR-8	TAATACTGTCAGGTAAAGATGTC	4906	174
bge-miR-10	TACCCTGTAGATCCGAATTTGT	3242	66
bge-miR-263a	AATGGCACTGGAAGAATTCACGG	3189	1976
bge-miR-184	TGGACGGAGAACTGATAAGGGC	1890	431
bge-miR-279b	TGACTAGATCCACACTCATCCA	1563	441
bge-miR-252	CTAAGTACTAGTGCCGCAGGAG	1401	68
bge-miR-276b	TAGGAACTTAATACCGTGCTCT	475	8
bge-miR-9a	TCTTTGGTTATCTAGCTGTATGA	371	7
bge-miR-71	TGAAAGACATGGGTAGTGAGAT	335	52
bge-miR-100	AACCCGTAGATCCGAACTTGTG	238	113
bge-miR-276-5p	AGCGAGGTATAGAGTTCCTACG	110	30
bge-miR-306	TCAGGTACTGAGTGACTCTGAG	100	13
bge-bantam	TGAGATCATTGTGAAAGCTGATT	81	26
bge-miR-305	ATTGTACTTCATCAGGTGCTCT	78	36
bge-miR-92b	AATTGCACTTGTCCCGGCCTGA	78	57
bge-miR-125	TCCCTGAGACCCTAACTTGTGA	60	1
bge-miR-317	TGAACACAGCTGGTGGTATCT	44	0
bge-miR-993a	GAAGCTCGTCTCTACAGGTATC	36	0
bge-miR-263b	CTTGGCACTGGAAGAATTCACAG	29	22
bge-miR-2a	TATCACAGCCAGCTTTGATGA	27	13
bge-miR-34	TGGCAGTGTGGTTAGCTGGTT	24	0
bge-miR-14	TCAGTCTTTTTCTCTCTCCTAT	23	0
bge-miR-79	ATAAAGCTAGATTACCAAAGCA	14	29
bge-miR-283	AAATATCAGCTGGTAATTCT	13	43
bge-miR-315	TTTTGATTGTTGCTCAGAAAGCC	13	0
bge-miR-87	GTGAGCAAAGTTTCAGGTGTGT	12	15
bge-miR-iab-4	ACGTATACTGAATGTATCCTGA	9	0
bge-miR-375	TTTGTTCGTTCGGCTCGAGTTA	8	0
bge-miR-190	AGATATGTTTGATATTCTTGGTT	5	0
bge-miR-279a	TGACTAGATCCACACTCATTCA	5	17
bge-miR-92a	TATTGCACTTGTCCCGGCCTAT	5	5
bge-miR-iab-4as-5p	CGGTATACCTTCAGTATACGT	5	0
bge-miR-12	TGAGTATTACATCAGGTACTG	0	20
		6926591	291829
