# Supplementary material for: Deep Sequencing of Organ- and Stage-Specific microRNAs in the Evolutionarily Basal Insect Blattella germanica (L.) (Dictyoptera, Blattellidae)
Source: PLoS One. 2011 Apr 28;6(4):e19350. doi: 10.1371/journal.pone.0019350 (PMC3084283; doi:10.1371/journal.pone.0019350)
Supplement: Table S2 — Sequences and number of reads of known miRNA* found in WB-6 and Ov-A libraries of Blattella germanica. (XLS) [file pone.0019350.s006.xls]

## Sheet: Table S2
Table S2. Sequences and number of reads of known miRNA* found in WB-6 and Ov-A libraries of Blattella germanica
miRNA*	miRNA_seq	WB-6	Ov-A
mir-8*	CATCTTACCGGGCAGCATTAG	47160	3395
mir-10*	AAATTCGGTTCTAGAGAGGTTT	817	24
mir-281*	AAGAGAGCTATCCGTCGACAGT	722	722
mir-276a*	TAGGAACTTCATAACGTGCTAT	9450	1024
mir-9c*	TCTTTGGTATCCTAGCTGTAG	103	35
mir-1*	TGGCATGCAAGGAAGCATGGAG	108	0
mir-993a*	TACCCTGTAGATCCGGGCTTTT	70	12
mir-965*	TGGGGTGGAAAGTTGTATAGAG	338	19
mir-9b*	ATAAAGCTAGATTACCGAAGTCA	14	29
mir-276-5p*	TAGGAAGTTCAGACCGTGCTCT	218	7
mir-184*	TGGAATGTAACGGAGTCTGGCG	85	0
