# Supplementary material for: Deep Sequencing of Organ- and Stage-Specific microRNAs in the Evolutionarily Basal Insect Blattella germanica (L.) (Dictyoptera, Blattellidae)
Source: PLoS One. 2011 Apr 28;6(4):e19350. doi: 10.1371/journal.pone.0019350 (PMC3084283; doi:10.1371/journal.pone.0019350)
Supplement: Table S3 — Comparison of miRNA abundance data obtained by qPCR and number of Solexa reads for a selection of known miRNAs. (XLS) [file pone.0019350.s007.xls]

## Sheet: Table S3
Table S3. Comparison of miRNA abundance data obtained by qPCR and number of Solexa reads for a selection of known miRNAs
WB-6 library
miRNA	qPCR	Solexa reads
miR-1	10538.6	6826964
let-7	1434.48	32201
miR-275	1563.83	13876
miR-8	1713.97	4906
miR-10	623.01	3242
miR-184	403.07	1890
miR-100	515.12	238
miR-9a	598.09	371
Bantam	126.04	81
miR-125	999.17	60
miR-14	3120.68	23
miR-92b	144.8	78
miR-305	127.49	78
miR-2a	988.65	27
miR-34	111.83	24
Ov-A library
miRNA	qPCR	Solexa reads
miR-1	2476.9	246874
let-7	2823.4	19103
miR-275	1284.5	3971
miR-100	474.7	113
miR-184	772.6	431
miR-10	154.6	66
bantam	66.1	26
miR-92b	519.1	57
miR-9a	177.3	7
miR-125	1070.8	1
miR-305	119.8	36
miR-2a	780.6	13
