# Supplementary material for: Deep Sequencing of Organ- and Stage-Specific microRNAs in the Evolutionarily Basal Insect Blattella germanica (L.) (Dictyoptera, Blattellidae)
Source: PLoS One. 2011 Apr 28;6(4):e19350. doi: 10.1371/journal.pone.0019350 (PMC3084283; doi:10.1371/journal.pone.0019350)
Supplement: Table S5 — Non-redudant miRNA candidates found in the WB-6 and Ov-A libraries of Blattella germanica. (XLS) [file pone.0019350.s009.xls]

## Sheet: nr_candidates_TableS4
Table S5. Non-redudant miRNA candidates found in the WB-6 and Ov-A libraries of Blattella germanica. Those shared with other species are indicated. Those by the moment specific of B. germanica are highlighted in blue
				Locusta	Acyrthosiphon		Bombyx mori		Culex	Aedes
Seq_id	Sequence	WB-6	Ov-A	migratoria	pisum	Whole body	Anterior silkgland	Posterior silkgland	quinquefasciatus	albopictus
bge_candidate1	TGTGATGTGCATGTGGGCTTTCC	1165	4585181	X	X
bge_candidate2	TGTGATGTGCATTTGGGCTTTCC	0	190125
bge_candidate4	TGTGATGTGCATGTTGGCTTTCC	0	140048
bge_candidate6	TGTGATGTGAATGTGGGCTTTC	57	66415		X
bge_candidate13	TGGAATGTAAATAAGTATTTAG	52512	37865
bge_candidate16	GAAGCTCACAGGGGCAGAGTGGA	0	15844
bge_candidate18	TGGGATGTAAAGAAGGATGGTG	9318	115533
bge_candidate19	GTAAGTAGTTCTGCCGAAGACA	10403	68
bge_candidate23	TGGAATGTAAAGAAGGATGTAG	3573	8780		X	X	X	X
bge_candidate24	TGGAATGTAACGCCGTCTGGCG	53019	731
bge_candidate28	TGGAATGGAAAGAAGGATGGAG	42486	1247		X	X			X
bge_candidate44	GACGAGAGCTTTCGCGGCTGGTG	4030	0
bge_candidate49	AGCAGCCGAGCCAGCCTGACGA	3724	6
bge_candidate51	CCCGTTGGGCGGTATTCGGGCG	4766	7
bge_candidate52	GTAGGCCGGCGGAAACTACTTG	2777	4339	X	X		X	X	X
bge_candidate53	TGTGATGTGCACGTGGGCTTTCC	0	15911
bge_candidate63	TGTGATGTGCATGTGGGTTTTC	0	8468		X
bge_candidate70	CGTTTCGCAGAGCTCGGCCACC	2935	0
bge_candidate81	GAGGGCTGGGCACGGGGGTC	5419	0			X
bge_candidate90	TCAGTCGTACCAAGCAGAGTGC	2275	238
bge_candidate97	GGGAGGGGGGAACGGGCTTCGAC	2111	9
bge_candidate98	GGCGTGGTCGGGAAGCGGGTC	2196	0
bge_candidate100	AGTTCTACAGTCCGACGATC	3417	1397
bge_candidate110	GTGAGCGTCCGGACCGAGGGCAA	1778	0
bge_candidate111	CCGGGTCAGGGCGGGTACGGGGG	1748	0
bge_candidate112	GTTCGGACTGGTGTTAGAGACG	45	1883
bge_candidate116	CGTCTCCCGTCGGCGGCGCTTA	1660	0
bge_candidate118	TATCTCGGAATGTAACGCGCAG	1651	6
bge_candidate121	TTCGACAGCGGCTCGGCACCTAA	18	2072
bge_candidate122	ACGCGGAAGCGCGTCCGGCCGC	1593	0
bge_candidate124	CCAAAAGGACGGCCGGCCCGCA	1885	0
bge_candidate131	CGGCCACTGGCGGAGAAGCTTG	1598	0
bge_candidate134	AGGAGCGGACGAAGGGGGCTGC	1425	0
bge_candidate146	TGGACTGTAAAGAATTATGGAG	8556	309			X
bge_candidate147	CGCGGCCACCTCTGGAGGCGG	1270	0
bge_candidate149	AGTATCAGAAGTAGATGACG	1254	306
bge_candidate155	CTCGGAGGAGCCGCAGAAGCAG	1340	118
bge_candidate159	CAGGCTGCCGCGAGATCGTCGC	1175	0
bge_candidate167	CTACGAACCAGAATGACATCGCG	376	1078
bge_candidate177	CCCCGTTGGGCGGTGTTCGGGC	1037	0
bge_candidate182	TGACTAGATCCATACTCGTCT	1015	107	X		X	X	X
bge_candidate189	CATCGGGCGACGCCTTCGGGCC	983	0
bge_candidate192	GCATTTGCCGGACGGGGCCTAAG	980	0
bge_candidate196	TGTGATGGGAATGTGGGCTTTT	0	1584
bge_candidate213	CGCGACTCGTTGGGCACCGGTCT	868	0
bge_candidate214	TGGAATATAAAGAAGAATGGAG	3034	151		X	X
bge_candidate217	CAGCTTTCGTCGTGCATGCCGG	858	40
bge_candidate239	CGCGTCGGGCGTGGTCGGGAAGC	797	0
bge_candidate244	AGCCTCGGCGAGTAGGAGGGCG	786	0
bge_candidate253	TGGGTACAGAACTGCAGAAGAG	763	122
bge_candidate260	CAGTGAGGCGGATCGCGAGCAG	1176	13
bge_candidate268	AAAAGTTTTCGGAAGACGGCCT	849	30
bge_candidate276	GTTCTACAGTCCGACGGATC	971	575
bge_candidate287	TGGAATGTAAGAAGTATGGAG	667	17	X	X	X	X	X	X
bge_candidate295	TGAGGTAGTAGTTTGTATATTT	34	1235				X
bge_candidate302	AAAAGCGGGCCCGCCGGGCTGA	754	0
bge_candidate327	GTTCTGGGGGCGTGTGCGTGGTT	575	0
bge_candidate329	GTGGGTTGGTTCTGGGGGCGTGT	570	0
bge_candidate332	AGGCAAGATGTCGGCATATCTG	1044	1839
bge_candidate336	CCGTAAGGGGCATCGGGCGACG	557	0
bge_candidate339	TGGAATGTAAAGAAGGCTGGAG	2022	306		X				X
bge_candidate341	CGAGGGAGAACGAGGCACGGGC	932	0
bge_candidate343	AAGGAGGCGCCGGCATGCACGA	537	37
bge_candidate344	TTTGATGTATTCAGGATTTTGGA	6	535
bge_candidate356	GGCGGATTGAAAGCTAGAAGACC	519	209
bge_candidate372	TGGAATGTACAGAAGGATGGAG	437	496		X	X
bge_candidate373	TGACTAGAGTGACACTCGTCGA	484	159	X
bge_candidate383	AGCGGCAAGGTCTGGAGTGAAG	47	473
bge_candidate394	CGCGGTAAGCTCGGAGGGCGAG	452	0
bge_candidate395	GTGGCTGTGGACGCGGAAGCGC	451	0
bge_candidate406	ATACGATTCAAGCTGCAGCTCG	440	61
bge_candidate413	CGCTTGCGTGACGGGTGTGCC	1342	0
bge_candidate424	AGGCAAGATGTCGGCATCGCTG	428	566
bge_candidate435	CTGTGGAGACGCTGCCGCCTGC	399	0
bge_candidate443	TGGAATGTAAAGACGGATGGAG	1000	237		X	X	X
bge_candidate446	CAGCTCGCAGCTTTCGTCGTGC	386	0
bge_candidate486	CCGTGTCAGTCGTACCAAGCAG	357	0
bge_candidate491	GCCGCGAGATCGTCGCCAACCA	353	0
bge_candidate492	TCCGCTAGTAGACGGCCTTTCAT	353	176
bge_candidate495	TGTGGTGGGCATGTGGGCTTTT	0	1429
bge_candidate496	TGCTCCCGCGGGGCGAAAGGGAA	351	0
bge_candidate498	TGAGGTAGGAGGGTGGATAGTT	20	1475				X	X
bge_candidate514	CATCTTACCGGGCCGCCTTAG	474	23
bge_candidate519	GACTCCTTGACCGCTGAAGCCTG	331	21
bge_candidate522	CATCTTACAGGGAAGCATTAG	328	0
bge_candidate527	AGGAAAGATGTCGGCATAGCTGA	323	22
bge_candidate529	CTGACTCGACCCCTGCTGGCGG	322	0
bge_candidate532	AGGCACGATGTCGGCATAGCTG	5	320
bge_candidate533	ACAGGCTAGAATCTCAGGTAT	320	223	X
bge_candidate534	TGTGATGTGCATGTGGCTTTT	0	319
bge_candidate535	CTCTGAGGACCGGGGCGCGTC	319	0				X	X
bge_candidate538	CTGCGGACTGGAGCAGTCGGCC	318	0
bge_candidate570	TGGACTTTAAAGAAGTATGGAG	291	47		X	X
bge_candidate585	TGGAAGGTAAAGAAGTAGGGAG	280	0		X
bge_candidate592	ATGAGGGGACAGGCTGCCGCGA	278	0
bge_candidate597	TGGAATGTCAATAAGTATGGAG	274	0		X
bge_candidate599	TGGACTGTAAAGAAGAATGGAG	942	70		X	X
bge_candidate603	AGTAATACTGCAGGGCTGCTA	271	0
bge_candidate607	AGTTCTACAGTCCTACGATC	121	270		X
bge_candidate608	TCAATATCAGAAGACTCACGCCA	270	27
bge_candidate609	TCGCTTGGTGCAGATCGGGAC	269	31	X	X	X	X
bge_candidate616	AAATATACAATTAAGACTGCA	265	33
bge_candidate617	TCAGGTACATGAAGGAGCGCGCG	265	0		X				X
bge_candidate618	CCAGTTCGGGATCCCGGTCGGC	265	0
bge_candidate628	TGGAATGTAAATAAGTCTGGAG	260	5			X		X
bge_candidate639	TCGTTACTGAGCCTGCGAGTCGA	256	0
bge_candidate644	ATTGCGAGGCTCCGGGCGACGT	255	0
bge_candidate647	CGGAACCGAGTCCAGCCACGTC	254	0
bge_candidate651	TGGACTCGGTTCCGACCACGGC	253	0
bge_candidate661	TGGAATGGAAAGAAGTCTGGAG	364	0		X
bge_candidate666	GCTGTTCGCGGCGTGGCTTCGC	245	0
bge_candidate673	AGGCAAGATGTCTGCATAGCTG	5	242
bge_candidate680	TGGAATTTAAAGAAGTCTGGAG	240	0		X	X
bge_candidate694	TCAGATCGCAAGCCAGTAACGCC	234	38
bge_candidate697	CGCTGGCAGGCGAGGCATTTTC	233	6
bge_candidate701	CCGGGCGGAGCGGTCGTCGGTGC	231	0		X
bge_candidate703	CACTGGAGAGCGAGGAGATGTC	230	8
bge_candidate711	CAGCTTACCGGGCAGCATGAG	227	0
bge_candidate722	TGGACTGTAAATAAGTATGGAG	224	21		X	X
bge_candidate725	TGTGATGAGAATGTGGGCTTT	0	223
bge_candidate727	GTGGCCGCGGACGCGGAAGCGC	222	0
bge_candidate731	AGGCAAGATGTCGGCAGAGCTGA	19	220
bge_candidate737	CACAGATAGCCTCGGCGGCACC	219	6
bge_candidate747	ACCAGGAGTGGAGCCTGCGGC	213	0	X	X	X	X	X	X	X
bge_candidate752	TGGAATGTCAAGAAGCATGGAG	604	141		X	X
bge_candidate757	TACGGGGCAATAGAGGCAGAAT	211	9
bge_candidate764	CGCCTGGCTGAGGGTCGGCT	404	0
bge_candidate771	CGCGTCGAGCGGGCTTAGGCAG	205	0
bge_candidate774	CGGGACCCCTAAGGAGCGGACG	204	0
bge_candidate775	AGCTCTAGACTCGGCCGTGCGG	203	0
bge_candidate781	TGGAATGTAAAGAATTCTGGAG	202	9		X	X
bge_candidate782	TGGAATGTAACGAAGGATGGAG	655	86		X	X			X
bge_candidate787	GAGGGCGGGGCACGGGGGTCC	201	0
bge_candidate809	GCGGTGAGCGCGGAAGGGTCTGG	197	0
bge_candidate815	AGGTCTACAGTCCGACGATC	195	0		X
bge_candidate828	TGGAATTTAAAGCAGTATGGAG	193	5			X
bge_candidate829	CGGGAGAAGCTGTAACGATTATG	192	62
bge_candidate832	CATATTACAGGGCAGCATTAG	191	0
bge_candidate840	TGGAATTTAACGAAGTATGGAG	190	19		X				X
bge_candidate842	GCCGGACGGGGCCTAAGCGCGG	190	0
bge_candidate855	TGACAGTACAGGAGTAGCATACA	184	66
bge_candidate858	AGAGGTCGCGCCGGCTCGTACC	301	0
bge_candidate865	AGGCAAGATCTCGGCATAGCTG	155	199
bge_candidate868	TGGAATGTAAAGAATAATGGAG	294	9		X	X
bge_candidate869	CAGCTTACAGGGCAGCATTAG	181	0
bge_candidate871	TGGAATGTCAAGAATTATGGAG	180	0		X	X
bge_candidate883	TACATAACCGCAACCACCGACT	38	177
bge_candidate886	TGGAATGTACAGAATTATGGAG	177	8		X	X			X
bge_candidate896	CAGAATGGAGTGAGCAGATCGA	174	18
bge_candidate901	CGCATGTTTGCAGAGCCTGGCA	172	81
bge_candidate906	TGGAATGGAAATAAGTATGGAG	171	0			X
bge_candidate912	AGGCAAGATGTGGGCATAGCTGA	170	7
bge_candidate917	TGGAATGTAAATCAGTATGGAG	169	0		X	X
bge_candidate919	TGGAATGTAAATGAGGACTTT	0	168
bge_candidate921	TGGAATTTAAAGACGTATGGAG	168	20			X
bge_candidate924	TGGAATGTAACTAAGTATGGAG	167	27		X	X
bge_candidate929	CCGGGCGAGTGCGAGAGAGTGG	166	0
bge_candidate937	GTGCGTGAAGCGGCTGTTTCCG	281	0
bge_candidate939	CGGCGGGCGGCTTCCGGGAAACC	165	0		X
bge_candidate941	CATATTACAGGGAAGCATTAG	164	0
bge_candidate944	TGGAATGTAAAGACTTATGGAG	164	0		X	X
bge_candidate947	TCTGGTTGTAGGTGCGCAAAAG	163	12
bge_candidate959	CGGTTGGGCGGAGCGCGTGCGTC	161	0
bge_candidate962	CATATTACCGGGAAGCATTAG	160	0
bge_candidate970	GCGGATCTTCCACGCTGCGAGGG	158	0
bge_candidate973	TGGAATGTAAAGCATTATGGAG	158	0		X	X
bge_candidate978	CGGCGATATCCCTCTGGCGGCT	157	0
bge_candidate979	AGGGCGAGGGCAGAAGTTCTGC	157	38
bge_candidate985	TCCGACGGGTGAGGGCGCAACTC	156	0
bge_candidate989	GAGGGCTACGCGGAGAGGTCG	155	0
bge_candidate993	ATCCTGCTGACGAGGCTTTGCC	154	20
bge_candidate1003	TGAGGTAGGAGGTTGTATATTT	0	152				X	X
bge_candidate1006	CGGGACCAGTAACCAGCCGGCC	152	0
bge_candidate1021	CCCGGACCAAGCCTGGCTGAGGG	149	0
bge_candidate1022	TGGAATGTAAATACGTATGGAG	149	44		X	X
bge_candidate1033	AGTTCTACAGTCCGCCGATC	0	147		X					X
bge_candidate1051	TGGGATAGAAAGATGTATAGAT	144	0
bge_candidate1052	CACCTGTAGTGGTCTGGCCGGC	144	0
bge_candidate1058	TGTTATGTGAATTTGGGCTTT	0	143
bge_candidate1077	ACGTGCCGGGCCTGGGCGAG	141	0	X
bge_candidate1085	CCGGGCCTGGGCGAGGCGATG	140	0
bge_candidate1087	GGCCTGCCGGGCTGACGGACAA	241	0
bge_candidate1093	CGGCTCAGCGGTGTGCTTCACG	139	0
bge_candidate1097	AAGGATTGCAGGGCCCAGGGACC	139	0
bge_candidate1101	CGCGATCGTAATGGCAACGGTG	138	5
bge_candidate1107	CAGAGTTCTACAGTCCGACTATC	138	86		X					X
bge_candidate1111	TCTCTACCGTCTCTGCATCACTA	137	7
bge_candidate1116	AGTTATACAGTCCGACGATC	136	0		X
bge_candidate1119	GAGGGCTGGGAACGGGGGTCC	135	0
bge_candidate1123	TGGAATGTAAAGAACGATGGAG	134	18		X	X
bge_candidate1129	CATCTTACCGAGCAGCATTAG	133	43				X	X		X
bge_candidate1138	TGGAATGTAAAGACGTACGGAG	132	14		X
bge_candidate1140	TTCGGAAGACGGCCTAATTCAC	132	22
bge_candidate1148	AGAAGCCGGGGATGACTCTCTC	131	30
bge_candidate1152	GCAAGACGGACCGAAGCGAAAG	131	0
bge_candidate1165	ACAGCAAAGTGGAAGAGGCCGA	84	128	X
bge_candidate1167	TGACTTCTTAGGGACATAAGACA	128	54
bge_candidate1171	CGTTGAGCGAAGAGGAGGCCGG	127	0
bge_candidate1179	TGCGACGTATGGGAATGGCACGA	244	7
bge_candidate1193	AGTTCTACAGTCCGACGCTC	0	124		X
bge_candidate1197	TTGGAGTTGCAGAATTAGGCCTA	124	12
bge_candidate1205	CGCCAGTGGCCGGGACCCCTAA	123	0
bge_candidate1213	TGTGATGTAAATGTGTGTTTT	0	122
bge_candidate1214	TCTCGTGTGGCTGGCTTCCGACG	122	0
bge_candidate1234	GAGGACGGCAACTTTCTGCTTG	119	35
bge_candidate1240	TGAGGTAGTAGGTTGGATATTT	0	118				X
bge_candidate1244	TGGAATGTAGGGAAGTATGGAG	118	0
bge_candidate1260	TGGAATGTAAGAAGGATGGAG	116	0			X
bge_candidate1262	TCAAGGCGTCTGGCGGCTTCTGC	116	0
bge_candidate1265	CAAACCCAAGCGCCGTAGACGA	116	6
bge_candidate1282	TGGAAGGTAAAGTAGTATGGAG	113	0			X
bge_candidate1286	AGGCAATATGTCGGCATAGCTG	77	112
bge_candidate1290	TGTGATGTGCATGTGGTATTT	0	112
bge_candidate1293	CCCGGACCACGCCTGGCTGCGGG	112	0
bge_candidate1295	CGGTCGACTTCCCGGGTTTGGC	112	0
bge_candidate1300	AAGAGACTGAAGACTGGCTTGA	111	20
bge_candidate1311	CAGAGGTGGCTGTGGACGCGGA	110	0
bge_candidate1312	TGGAATGGACAGAAGTATGGAG	110	0		X	X
bge_candidate1319	CCTCTCGTGGCCAATGCAGAAA	109	8
bge_candidate1329	AGGCCAGATGTCGGCATAGCTG	87	108
bge_candidate1330	GAAGATCACAGTGGCAGAGTTGA	0	108
bge_candidate1332	AGCGAGTGAAAGGTTGTAGGTT	108	70
bge_candidate1334	GACGACTTAGGTACCGGGCGGGG	108	0	X
bge_candidate1340	TGGAACGTAAAGAAGTATGTAG	184	128		X		X	X
bge_candidate1347	TCCTTCGCGGTCGTCTGCGGCG	107	0
bge_candidate1352	AGGCAAGATGTCGGGATAGCTG	106	25
bge_candidate1364	CATCTTACCGCGCAGCATTAG	105	15				X			X
bge_candidate1369	TCCGAATATTGAAAGCTGAAGCA	105	53
bge_candidate1378	CATCTTACCGGTCATCATTAG	104	0
bge_candidate1379	AGTTCTACAGTCCGCCGCTC	104	0		X
bge_candidate1380	GGCTCTCGCGGTGTACTCTTCGG	104	0
bge_candidate1390	CAGCTTACCGGGAAGCATTAG	103	0
bge_candidate1397	TGGAATGGCAAGAAGTATGGAG	103	0		X
bge_candidate1401	TGAGGTAGTAGGGTGTATATTT	0	102				X	X
bge_candidate1404	TGGAATGTAAAGCAGTACGGAG	102	0		X
bge_candidate1415	CAACAACGGAAGCAGATGACAA	101	26
bge_candidate1424	TGTGCTGAGCATGTGGGCTTT	0	100
bge_candidate1427	TTCTGACGGGGAGGGCGCGACTC	100	0
bge_candidate1429	TGGCCCACAAGTACATCATTTC	0	5
bge_candidate1430	ACGGTGGTCTCGCGCCAAGCGCTT	5	0
