# Supplementary material for: Deep Sequencing of Organ- and Stage-Specific microRNAs in the Evolutionarily Basal Insect Blattella germanica (L.) (Dictyoptera, Blattellidae)
Source: PLoS One. 2011 Apr 28;6(4):e19350. doi: 10.1371/journal.pone.0019350 (PMC3084283; doi:10.1371/journal.pone.0019350)
Supplement: Table S6 — Statistical analysis of the experiments of dicer-1 RNAi to validate miRNA candidates. (XLS) [file pone.0019350.s010.xls]

## Sheet: Table S6
Table S6. Statistical analysis of the experiments of dicer-1 RNAi to validate miRNA candidates
EXPERIMENTS WITH KNOWN miRNAs
In sixth instar nymphs (whole body extracts)
miRNA	Expression	Fold change	Std. Error
miR-1	0.345	-2.899	0.203	0.619
let-7	0.171	-5.848	0.092	0.3
miR-275	0.153	-6.536	0.043	0.334
miR-100	0.235	-4.255	0.089	0.566
miR-125	0.172	-5.814	0.068	0.352
In the adult stage (ovary extracts)
miRNA	Expression	Fold change	Std. Error
miR-1	0.162	-6.173	0.107	0.245
let-7	0.117	-8.547	0.085	0.194
miR-275	0.182	-5.495	0.12	0.259
miR-100	0.12	-8.333	0.094	0.167
miR-125	0.198	-5.051	0.136	0.291
EXPERIMENTS WITH miRNA CANDIDATES
In the adult stage (ovary extracts)
miRNA	Expression	Fold change	Std. Error
bge-candidate1	0.27	-3.704	0.116	0.838
bge_candidate4	0.033	-30.303	0.008	0.103
In sixth instar nymphs (whole body extracts)
bge_candidate24	0.361	-2.77	0.218	0.548
bge_candidate28	0.425	-2.353	0.303	0.659
