# Supplementary material for: Deep Sequencing of Organ- and Stage-Specific microRNAs in the Evolutionarily Basal Insect Blattella germanica (L.) (Dictyoptera, Blattellidae)
Source: PLoS One. 2011 Apr 28;6(4):e19350. doi: 10.1371/journal.pone.0019350 (PMC3084283; doi:10.1371/journal.pone.0019350)
Supplement: Table S7 — Small RNA sequences derived from Blattabacterium sp. genome. (XLS) [file pone.0019350.s011.xls]

## Sheet: Table S7
Table S7. Small RNA sequences derived from Blattabacterium sp. genome
Seq_id	Seq	WB-6	OV
bge_tophit6403	CAATGCATACTGACGGAACA	0	20
bge_tophit6402	AAAAGGCACAGAGCGGAACC	0	20
bge_tophit6405	AGACTGAAAGAACAGCATAA	0	20
bge_tophit6406	AAAAAAGAATCGGAGGATAA	0	20
bge_tophit6409	AAAAAGCGGAATGATTGCATA	14	20
bge_tophit10447	AGATACGGACCAGACTCCTACGG	10	0
bge_tophit2006	AAAAAAGAATCGGAGGATAC	85	0
bge_tophit9445	TTATACGGAACGGACATACC	12	0
bge_tophit9446	AGGAGAAATGAATGCAGAAC	12	0
bge_tophit9447	AAAAGTAGAACAAATGCCGG	12	0
bge_tophit9441	AAAGAGGAACGGACCCTAAC	12	0
bge_tophit9443	AATTGGAAAAAAGTGGAAGA	12	0
bge_tophit9448	AAATAGGAATAGTAGAAGAC	12	0
bge_tophit19200	AAAAGAAGCAGTAGAATACC	5	0
bge_tophit10857	TACAGGAACAGATACAGACG	10	0
bge_tophit3357	ATAGAGAGCAGAGGACTTAC	45	0
bge_tophit3353	TTAGAGCGTTGGATTCATAA	45	0
bge_tophit3358	CTGATGAAATAGAACCAGAAG	45	0
bge_tophit3359	CCGAGAGGATTAAGGCGCACG	45	0
bge_tophit16231	ATAGGAATTGGAGGAATGAT	6	0
bge_tophit885	AAAAAAGGACTTGAATGGCTTCA	70	225
bge_tophit14546	AGAATTTAAATCGGATATAT	0	7
bge_tophit11016	AAAAAGCGAGAAACGGGAATTG	10	0
bge_tophit19537	AATACGGTATAGAGGTTGATT	5	5
bge_tophit2587	GAAAAAAGAATCGGAGGATA	0	62
bge_tophit15042	TTTGGGCTGCGCGTCAAGCTATA	6	0
bge_tophit10059	AGAAATACGGCTAGTGGAAC	11	0
bge_tophit10052	ATGTAGAATTAGAGCACAAG	11	0
bge_tophit10050	GAATCTAGTAGCAGTAGAAG	11	0
bge_tophit13021	AATGCGGTCTGGACGGGACA	0	8
bge_tophit8189	AAACTCTGAACCAGCCACGCCG	14	0
bge_tophit9633	TAAATCACAAACAGAACACGCA	0	12
bge_tophit4744	AAAAGGACTTGAATGGCTTC	29	0
bge_tophit4746	ATAGCAGGTTGGAAGAATTC	29	0
bge_tophit4747	ATGGAATAGAATATGCAGAA	29	0
bge_tophit4741	AGCTGACGTAATGACTATTT	29	0
bge_tophit4742	ATTAGCGCTGATGGTACTGG	29	0
bge_tophit16684	AAAAAAGGCACAGAGCGGTA	0	6
bge_tophit16680	ACCACGTGGGCTGAAAGTGA	0	6
bge_tophit16683	AAAGCGGAGAGAAAGGGACC	0	6
bge_tophit16682	AAGCGAGAAACGGGAATTGA	0	6
bge_tophit19196	ACGAAAGTAGGGCATAGTGA	5	0
bge_tophit433	TGATAGAAAAGCTGGCAGAA	573	0
bge_tophit432	AAAATACAGAATTCGGAATAC	574	0
bge_tophit19993	ACCGGGGGGTAGGCAGATAG	0	5
bge_tophit20961	AAAAAGAATCGGAGGATATTTTA	0	5
bge_tophit19229	AAAACTGGAACGGCTCAAAC	5	0
bge_tophit19224	ACAAGCAGAACGTTTTAATA	5	0
bge_tophit19223	ACTGGCTTGCGAGCAGAACC	5	0
bge_tophit2023	ATGCGGTCTGGACGGGATTT	84	0
bge_tophit14214	AGTGGGGGAACATAGGGGCA	7	0
bge_tophit14215	AAAAGAAAAGAACCTTTTGA	7	0
bge_tophit718	ATGATAGAAAAGCTGGCAGAC	287	0
bge_tophit16178	ATAACAAGACTGATAGCTAT	6	0
bge_tophit16413	ACGTGGTGAAAATGGTAGACA	6	0
bge_tophit6264	AAATTTATTATAGCGGACGTCG	20	0
bge_tophit17833	AAGCTAGAAGACTCAATTTAGGA	5	0
bge_tophit16215	CCTTAGAAGAAGTCGGACAC	6	0
bge_tophit16213	ATATCAAACGTCGGCATTTT	6	0
bge_tophit16210	AATGCGGTCTGGACGGGAGT	6	0
bge_tophit16211	AGAAGGAGAAGCTGATCTAA	6	0
bge_tophit11078	ATAAAAAGCGGAATGATTGCA	0	10
bge_tophit14772	AACAAAGCTTCTAGACCTGATG	0	7
bge_tophit14541	TATTAAAGCGGAGAGAAAGG	0	7
bge_tophit18850	ATTGTCGCAGGAGGTGGTGTAG	5	0
bge_tophit20478	TGAGGTGGTAATTTGTATTTTT	0	5
bge_tophit14134	GATAGAAAAGCTGGCAGAAA	7	0
bge_tophit19405	TTGTAAGATTCGTAGGTAAC	5	0
bge_tophit8831	ATTGAACGGCAAGCAGAATT	13	0
bge_tophit16669	CCACCGGAACTTGCAGCAGA	0	6
bge_tophit14242	CAATTTTGAACGGTAGAATA	7	0
bge_tophit20442	CATAAAAAAGCTGCTAGACCTGA	0	5
bge_tophit6606	GAATTGAACCCGCGGCCCCG	19	0
bge_tophit3550	ACCGTGGGCAATACTGGATT	42	0
bge_tophit3552	TGACTGTAGATCGTATGGGT	42	0
bge_tophit3553	AAGTATTGTAGCTACAGAAG	42	0
bge_tophit19249	AAGCGGGGACAATGAAAATA	5	0
bge_tophit19178	AATATTGTAGCTGGAAGCAC	5	0
bge_tophit19244	CAAAGGATTAGGAGAAATGC	5	0
bge_tophit16853	TGAGACCTGAAGATGGACTCT	0	6
bge_tophit6891	ACTCAAGCTAGAAGACTCAATTT	18	0
bge_tophit14209	CAACTGAAGAACCATACCCA	7	0
bge_tophit16276	GATCCTGTATGCATATGAAA	6	0
bge_tophit14233	TGAAGGGACTGCATTATTTT	7	0
bge_tophit14238	AAATACGGTATAGAGGTTGA	7	0
bge_tophit19210	TAGGGAAAAGTAGCAGAATT	5	0
bge_tophit19351	ACATGGAAAGTGCGACTTTG	5	0
bge_tophit19379	TTTTTGGAAAAGCAATGAAG	5	0
bge_tophit13179	ATTAAAGCGGAGAGAGAGGGAT	0	8
bge_tophit19374	TCATGTAAAACTCCTTCGGC	5	0
bge_tophit5268	CATAAAAAAGCGTCTAGACCTGA	25	0
bge_tophit3312	ATGATAGAAAAGCTGGCCGA	0	46
bge_tophit19373	AATGCGGTCTGGACGGGACC	5	0
bge_tophit5042	TTAAATCGGAGAGAAAGGGAT	0	27
bge_tophit17322	GTTAGGGTGGTAGGCGGGGGGTC	5	0
bge_tophit16272	AATCCGTAGATGCTATTGTA	6	0
bge_tophit16273	ATACGATTGACTGATGGCCA	6	0
bge_tophit18183	CATCAAAAAGCTTCTAGACCTGA	5	0
bge_tophit1219	ATGTGATCAAAGACGCAGAAAA	130	155
bge_tophit2543	AAATAGGAATAGTAGAAGACA	63	0
bge_tophit2545	AAACAGAATGCGGTCTGGACG	63	39
bge_tophit11057	AAAAAAGGAGGAAGAGGATG	0	10
bge_tophit11056	AAGAGGATGCGTTCGAGATG	0	10
bge_tophit11050	AAAATAGAACTCTACGTAAA	0	10
bge_tophit11053	ATGTAGAAACAGGATTTGTT	0	10
bge_tophit11052	AAAAAAGAATCGGAGGATAC	0	10
bge_tophit2897	ATGTATAGAGAGCAGAGGACTTA	54	0
bge_tophit12745	AAAACGATCAAGGAATGGTT	8	0
bge_tophit14132	GATTGGAGCGGGAGGGACCA	7	0
bge_tophit11941	CAAGTCGAAACAGGTTCTTC	0	9
bge_tophit11949	AGGAACATAAGTAGAAGGCC	0	9
bge_tophit11948	AAGCGGAGAGAAAGGGACAA	0	9
bge_tophit14538	GTTAGAGCGTTGGATTCATT	0	7
bge_tophit10099	AAAAAGGACTTGAATGGCTT	11	0
bge_tophit10096	GATCTGGAATGACGGCTGTA	11	0
bge_tophit10097	GGAACCGGTAAAAAAGCTTT	11	0
bge_tophit10095	TATAGAGAGCAGAGGACTTA	11	0
bge_tophit10091	TAACGGGAGAAGGGCATAAC	11	0
bge_tophit6650	AAGGAGGATTATATTTATTTG	19	0
bge_tophit19205	AAAAGTAGAAGCAAATATGG	5	0
bge_tophit14136	AATAGGAGCAGAATTAACAA	7	0
bge_tophit9549	TTATAGGAACATAAGTAGTAG	0	12
bge_tophit9548	ATGATAGAAAAGCTGGCATTA	0	12
bge_tophit19113	AATTGGAAGAGGTGGACAAA	5	0
bge_tophit5457	AAAAGAAGCAGTAGAATATA	24	0
bge_tophit5451	ATGATCCTGATCGAAAGACG	24	0
bge_tophit5459	AAAATAAATCGGGGTGACTGG	24	0
bge_tophit5458	TAGTAGAAGCAGAAGTTATG	24	0
bge_tophit12141	ATTGGGGGGACGACCGGATTCGA	8	0
bge_tophit16640	AAGTATTGTAGCTACAGAAG	0	6
bge_tophit16649	AGAACCATCGTGCACTCTTT	0	6
bge_tophit16399	AGTCTCGTAGCTCAGAAGGTT	6	0
bge_tophit20009	CCTTTGGAAGTAGAAGGTTT	0	5
bge_tophit20002	AGATATAGATGTAGCTTTTG	0	5
bge_tophit20005	AGAGTTGGAGCAGAGGTTAA	0	5
bge_tophit3124	AGGAGAAATGAATGCAGAACA	49	9
bge_tophit5871	TTAGAAGAAGTCGGACAATCT	22	0
bge_tophit5870	CAATTCCGCGCGAGACTACCA	22	0
bge_tophit19262	ATGCATCGTTTGGAAAATAA	5	0
bge_tophit4471	TTTGGATATAGAATACGGATAC	31	27
bge_tophit14202	AATGGAAGAACAGCGGCTGC	7	0
bge_tophit4008	AAAATGAGGAAAGTCCGGACA	36	33
bge_tophit4005	AAAAGGAACTAGAGTGGATG	36	0
bge_tophit12820	GAATGGGAGGAATGATGTAA	8	0
bge_tophit12822	TATGCATACAGGATCTGACC	8	0
bge_tophit12824	AGAAGGAGAAGCTGTTCATG	8	0
bge_tophit12827	ACAAGCAGATACGGGGACCC	8	0
bge_tophit12829	ATACGAAGATCGGGAAATAA	8	0
bge_tophit14250	ATTGATTGTGGATGTCGGTC	7	0
bge_tophit14252	AGTAGGACTATAAGCCGGAC	7	0
bge_tophit14254	ATACCAGTAGATAAGTGAAT	7	0
bge_tophit14259	AGACGACGTTTAGATACTCA	7	0
bge_tophit17757	AAGTCAAAAATACAGAATTCGG	5	0
bge_tophit16252	TGTAGAATAGGAATCAAAAA	6	0
bge_tophit16250	ACATAGAAAAACAGTAGGCT	6	0
bge_tophit16256	ATAACGAAAGAACAATGTTA	6	0
bge_tophit16257	ACCTTGCAAACGGTAGACTT	6	0
bge_tophit16258	GTAGAGCAAAGGACTGAAAC	6	0
bge_tophit14571	ACGTAGAGTTTGCAGGAGTC	0	7
bge_tophit15021	AAATGGAGAAGTAGAAATGGCA	6	0
bge_tophit4649	AATTTCATTGACTGTCGATC	0	30
bge_tophit1234	ATTGGGGCAGATGGAATCATT	75	153
bge_tophit1233	TGATAGAAAAGCTGGCAGAC	153	0
bge_tophit2525	ATTAAAGCGGAGAGAAAGGTAT	0	64
bge_tophit9535	GTTAGAGCGTTGGATTCCTA	0	12
bge_tophit138	ATTAAAGCGGAGAGAAAGGGAT	1043	2373
bge_tophit1446	AGTATGGAAAAGAGCTGAAGA	126	0
bge_tophit19316	AAGCACGTTTAGAACTAGGT	5	0
bge_tophit16327	AATGGGAGAACTCCATTTAG	6	0
bge_tophit3699	ATAACGGGAGAAGGGCATAA	0	40
bge_tophit12751	AAACGATCAAGGAATGGTTT	8	0
bge_tophit19638	CAAATTTTGTAGCGACAGACC	5	0
bge_tophit19192	AAAAGGGCGGCGACTTACCA	5	0
bge_tophit1439	AGATACGGCTTTAGAAGAGG	0	127
bge_tophit1433	ATTGAACGGCAAGCAGAATTA	128	42
bge_tophit1432	CGGGGTGTAGCTCAGATTGGTT	128	91
bge_tophit16244	AACAGGGTTGGTCGGTCGTG	6	0
bge_tophit16241	ATAGGGAAGTAGCAGGACAG	6	0
bge_tophit19501	ATAACGGGAGAAGGGCATAAC	5	0
bge_tophit16621	ATAAAAAAGCTTCTAGGCCTGAT	0	6
bge_tophit5853	AGAGAGCAGAGGACTTATTA	22	0
bge_tophit5851	TATTAAAGCGGAGAGAAAGG	22	0
bge_tophit5850	AATTTAAAATAGGAGCAGAA	22	0
bge_tophit5857	AAAATAGAACTCTACGTAAA	22	0
bge_tophit5859	TAAACCAGACGGGCATAGTG	22	0
bge_tophit5858	AAGCCGGATTCTGTATTTAA	22	0
bge_tophit19934	ATAAAAAAGCATCTAGACCTGAT	0	5
bge_tophit6904	TTTTTTGGAATCATGGGACG	18	0
bge_tophit6905	ATAAATGGAGCAAGCTGAAA	18	0
bge_tophit6902	ATTGGGTGGACGACCGGATT	18	0
bge_tophit10115	AATAAGGGGAAGAGGGCTCA	11	0
bge_tophit10114	TGTAGAATAGGAATCAAATT	11	0
bge_tophit6909	ACTCCGGCAACTCTCCCAAA	18	0
bge_tophit19286	AGAAGCGTCATGGATTTTTC	5	0
bge_tophit14278	ACTTGGGACTCTGATGAAGA	7	0
bge_tophit14272	CGATAGTTTTGCTCTAGACG	7	0
bge_tophit14270	AACACCAATATAGTAGAAGA	7	0
bge_tophit14271	AACCGTGGGCAATACTGGAT	7	0
bge_tophit14277	TAATGGAACAGCTTGACGCA	7	0
bge_tophit14275	ACCAGGAGATCGTAGGTTCA	7	0
bge_tophit3484	ATGTAGATGGATCAGTAGAAG	43	0
bge_tophit12846	AAGGGACTGCATTATTTTCA	8	0
bge_tophit18714	TGATGGAATTTTTCAAGTAGAAG	5	0
bge_tophit806	TATGGAAAAGTAGCAGAATT	252	0
bge_tophit2193	AGCTGACGTAATGACTATTT	0	76
bge_tophit19605	GATTAGGACGGGACACGGGAA	5	0
bge_tophit19137	GAGAGAAAAGCTGGCAGAAC	5	0
bge_tophit7168	AGCGGAAGCTCTGCGAGCGGCA	17	0
bge_tophit11768	AGTGTTTGGAGGAGGCTTTA	9	0
bge_tophit11762	CCGCGGCTGCTGGCACGGAG	9	0
bge_tophit11767	AAAGCGGAGAGAAAGGGACC	9	0
bge_tophit19138	TAAAGGATTCGCATAGACGC	5	0
bge_tophit11742	AAAACTGGTAGTCGAACATA	9	0
bge_tophit3675	ATAAAACCTATCAGAGGACG	40	0
bge_tophit3676	TGGATATAGAATACGGATAC	40	0
bge_tophit3671	AAATGGAATTCAAGCAGATA	40	0
bge_tophit3673	ATAACGGGAGAAGGGCATAA	40	0
bge_tophit5623	ACTTTAGTGACTACGGGACA	23	0
bge_tophit11983	TGAAAGCGGAGAGAAAGGGAT	0	9
bge_tophit19516	TTTTGGGGAATGGGAGCGACG	5	0
bge_tophit11749	AATGGAAAGAGGTGGGGCCA	9	0
bge_tophit19094	TAGAGTTCCTGTAGCAGATG	5	0
bge_tophit19097	AATTAGATCTTTAGCTGAAG	5	0
bge_tophit19096	ATGTAGAATAGGAATCAAAC	5	0
bge_tophit19099	TCATTCCAGCAGAACTTACG	5	0
bge_tophit19098	AAGGGGATAGAAACTATTTT	5	0
bge_tophit1414	AGAATGCGGTCTGGACGGGA	131	0
bge_tophit8906	ACTTGAACCAGCGACCACACG	13	0
bge_tophit9904	CGGGGTGTAGATCAGATTGGTT	11	7
bge_tophit16269	AAAAAGGAGAGGGAGCTATT	6	0
bge_tophit8827	AAAAGGACATGGAGGAAGAT	13	0
bge_tophit16268	AGAAGCGGTAAGGATTTCTT	6	0
bge_tophit5147	TGGTAGACGATCAGATGGCA	26	0
bge_tophit16353	TTTGCCGCACCCGTAGACGCA	6	0
bge_tophit16352	ATTGCATCATACTCGGCATTT	6	0
bge_tophit20811	TGTGGTGGTAATTTGTATTTTT	0	5
bge_tophit16689	AATGCGGTCTGGACGGGATC	0	6
bge_tophit16688	ATGGGACGGTGATAGTTTTG	0	6
bge_tophit16686	ACTTAGTAGCTAGAAGAACG	0	6
bge_tophit567	AGTCTCGTAGCTCAGACGGTT	387	139
bge_tophit560	AATGCGGTCTGGACGGGATT	394	0
bge_tophit19153	CGTAGTAGAAGCAGAAGTTA	5	0
bge_tophit10138	AAATAATTGTTGATCGTATGA	11	0
bge_tophit10136	GAAAAAAGGAGGAAGAGGATG	11	0
bge_tophit19250	TGATAGCAGAACTTGGACCT	5	0
bge_tophit14295	AAGTGGAGCAGGAGGACAAA	7	0
bge_tophit14293	AAAACTGGGACGTCATATAT	7	0
bge_tophit14298	AAAAAGAATCGGAGGATAAG	7	0
bge_tophit14299	AATGGAAGAGGGGACTGTAA	7	0
bge_tophit12732	TCCTGTATGCATATGAAACC	8	0
bge_tophit19348	TGATAGAAAAGCTGGCAGGA	5	0
bge_tophit12860	GATGCGGATATAGATGGAAG	8	0
bge_tophit12863	AAAGAGATTAACAGGACTTG	8	0
bge_tophit12862	GATTACTGGATTGGCAGATG	8	0
bge_tophit19344	TGGCATTGAAGGGACTGCAT	5	0
bge_tophit16209	TAGAAGAAGTCGGACAATCT	6	0
bge_tophit17885	AATAAAGGGCGTATGGTGGATGC	5	0
bge_tophit824	GTTAGAGCGTTGGATTCATA	244	0
bge_tophit4609	AGAATTTAAATCGGATATAT	30	0
bge_tophit4608	GCTAAAGACTGCAAAGGATG	30	0
bge_tophit4606	AAAAGGAATGTACGGAATGA	30	0
bge_tophit19305	TTCTGAGGGTCGCCGGTTCG	5	0
bge_tophit1273	AAAATGATTCGGAAGCAGAC	147	0
bge_tophit16169	AATATCAGTCTCTGCAGAAA	6	0
bge_tophit16165	TTTGGCAAGATAGACGGACA	6	0
bge_tophit16161	AAAGGGCGGCGACTTACTCT	6	0
bge_tophit11747	AGCAGGAAATGTAAAAGACG	9	0
bge_tophit19173	CCTGTGTAGAATTTGCAGAA	5	0
bge_tophit11938	ATCTTCACCTACTAAAAGTAGGT	0	9
bge_tophit7602	CATTTGGATAGATGGACATT	16	0
bge_tophit7603	TCTGCAGATATAGGCATTCCA	16	0
bge_tophit7604	GGTTAGAGCGTTGGATTCATA	16	0
bge_tophit15467	TTTTTTGGATCGCTCGGCAACG	6	0
bge_tophit6649	AAAATACAGAATTCGGAATAA	19	0
bge_tophit6646	AAAGCCTTTGTAGACGCAACT	19	0
bge_tophit14373	CAATAGGATTGGTGGAGGTTT	7	0
bge_tophit19641	ATGAGAGAAAAGCTGGCAGAA	5	0
bge_tophit20964	TGTGACTTTCATGTTTGCTTTCC	0	5
bge_tophit8432	ACACGTAGAGTTTGCAGGAG	0	14
bge_tophit8380	GAAAAAAGAATCGGAGGATAA	14	0
bge_tophit8438	CGTGTGGTCGCTGGTTCAAG	0	14
bge_tophit14337	ATTTAGGATTATCTGCAAAAG	7	0
bge_tophit14334	ACTGTAAGAACCGGATTCTAC	7	0
bge_tophit14331	AAATTAACGGCAGAAGATAGG	7	0
bge_tophit19339	AGAGACAGAGGATTCTTTCA	5	0
bge_tophit19985	AGAGCGGAGAGAAAGGGATT	0	5
bge_tophit19994	CGTGGTGAAAATGGTAGACA	0	5
bge_tophit19740	AGGTGGAATGGGAGGAATGATG	5	0
bge_tophit5163	AGCTAAAGACTGCAAAGGATG	26	0
bge_tophit5162	AAGTAGAACAAATGCCGGTCA	26	0
bge_tophit5160	ATGATAGAAAAGCTGGCAGGA	26	0
bge_tophit16373	AATTATCTATCGTTGCAGAAA	6	0
bge_tophit16372	CGAACTCGTTGCAGAATGGCA	6	5
bge_tophit16374	CTCTGAACCAGCCACGCCGCG	6	0
bge_tophit17978	ATTAAAGCAGAGAGAAAGGGATT	5	0
bge_tophit8439	TTAGAGCGTTGGATTCATAT	0	14
bge_tophit19177	AGAAAGATTGACCGGGACTG	5	0
bge_tophit14338	AGAAGGAACTGTAATCGGAGA	7	0
bge_tophit19973	ATAGGGATAGGAACAGCGGA	0	5
bge_tophit14336	CATTTGGATAGATGGACATTC	7	0
bge_tophit4410	TTTAATTTAAATAATTATTGAT	32	0
bge_tophit14333	AAATCCGGCAATAAATTTACA	7	0
bge_tophit14332	AAAAGGAACAGCAGATCAACG	7	0
bge_tophit541	AAATTAACGGCAGAAGATATG	413	82
bge_tophit19359	AAAAAGGAAAAACAGGGATG	5	0
bge_tophit4485	CTGTGTTGGAGGAGGACGTCGGG	31	0
bge_tophit19289	AGAAGACTTTTGATCATGAC	5	0
bge_tophit19288	GCACCCGTAGACGCAGGAAT	5	0
bge_tophit10907	TGGATTGAAAGAAAATGTGA	10	0
bge_tophit11829	CGATGGAAAAGTAGCAGAATT	9	0
bge_tophit11824	TCTTCTAAGCTGTCAGAAGA	9	0
bge_tophit16426	AGAATACGGACTGCTACTTCC	6	0
bge_tophit19599	TAAAATCAGAAAGACTAGTCA	5	0
bge_tophit6710	AGGAGCAGGAGGAGGTGGAA	0	19
bge_tophit4626	TCATATTAGAGTCGTCACACA	30	0
bge_tophit4624	CTATGGAAAAGGAGCAGAATT	30	0
bge_tophit5622	CGATTAGGATGTGCTGGTTC	23	0
bge_tophit5624	AGATTGGAGAGCAGGAAGAC	23	0
bge_tophit5625	CAAGCAGATACGGGGACTAC	23	0
bge_tophit16144	ATAAGTAGAAGAGGGCATTT	6	0
bge_tophit16140	ATATCCAGAAGACTCTCCCG	6	0
bge_tophit16141	AAAAGCGAGAAACGGGAATT	6	0
bge_tophit16419	CTTGGGCTATCAGTAGAAGAC	6	0
bge_tophit15416	AGAATGACTGTCATACAATAAGC	6	0
bge_tophit3752	AGAGTAATAAAACGGACACT	39	0
bge_tophit3753	ATTGATTGTGGATGTCGGTCA	39	29
bge_tophit3750	GATAGAAAAGCTGGCAGACC	39	0
bge_tophit3756	ATGGAATAGAATATGCAGAAA	39	0
bge_tophit153	ATAAAAAAGCTTCTAGACCTGAT	0	2100
bge_tophit9436	TAAATAGGAATAGTAGAAGA	12	0
bge_tophit9485	GCTGGATTTTTAGCAAGACGT	12	0
bge_tophit2908	TCATACGCAATGGATCGTCC	54	0
bge_tophit9101	ATAAAATCAGAAACCGGGCTAC	12	0
bge_tophit16310	AAAATATCGTACGGCTTACC	6	0
bge_tophit19557	ATAGCAGGTTGGAAGAATTCA	5	0
bge_tophit6108	AAAATGATTCGGAAGCAGAAA	21	5
bge_tophit1336	AATGCGGTCTGGACGGGATTT	140	0
bge_tophit19553	AAAAGGATTAACGAAGACACCA	5	0
bge_tophit19452	AGAAGCTGTACGAATGATAAT	5	0
bge_tophit19456	AGCTGGATTTTTAGCAAGACG	5	0
bge_tophit2731	AAATCCAGTCGTGGGTACCA	58	0
bge_tophit6912	ACAAAGGAAGAAGGAGGACG	18	0
bge_tophit6911	ATGAGGAAAACGGAACTACA	18	0
bge_tophit6917	AGAAGGAGTAGTAGAAGATG	18	0
bge_tophit6916	AGAAAAAAGAATCGGAGGAT	18	0
bge_tophit19330	AAAAAAGGAGGAAGAGGATG	5	0
bge_tophit19333	ATAGGAGTAGCAGTAGCGGT	5	0
bge_tophit14218	AAAAAAGGAGAGGGAGCTAT	7	0
bge_tophit14217	AGGAGAAGTAGTTTGCATAA	7	0
bge_tophit19323	CCACCGGAACTTGCAGCAGC	5	0
bge_tophit11806	AAGCTTCTAGACCTGATGTT	9	0
bge_tophit11807	ACGTAGAGTTTGCAGGAGTC	9	0
bge_tophit11803	TTCGCAGGAACGGATGAATC	9	0
bge_tophit11800	CATAGAGGGAAAGTAGGACT	9	0
bge_tophit11801	AAAAAGAGAACAAGCTGCAT	9	0
bge_tophit16407	AGTCTCGTAGCGCAGACGGTT	6	0
bge_tophit19174	TCAGCTATAGAAGATTTTGA	5	0
bge_tophit14377	AAGGAGACCTTTATGTAGACG	7	0
bge_tophit16153	CGCTTCACTTTTTGCTGAAG	6	0
bge_tophit19450	ATTAGGACGGGACACGGGAAA	5	0
bge_tophit16409	TCATGTAAAACTCCTTCGGCA	6	0
bge_tophit8880	AAATAGATACAGGATTGATG	13	0
bge_tophit8884	ATATGGAGAATCAGAACCGCC	13	0
bge_tophit4191	CGTACGCGACCTCGAAGGGACC	34	0
bge_tophit1107	AAAAGGAGAAGTAGTTTGCATAA	72	173
bge_tophit4995	GAATTGGGGCAGATGGAATCA	27	0
bge_tophit4997	ACCACCGGAACTTGCAGCAGA	27	0
bge_tophit5644	GTTAGAGCGTTGGATTCATAA	23	0
bge_tophit19556	AACACCCAGTAGAAGCAGATG	5	0
bge_tophit19116	TTGAAGGGACTGCATTATTT	5	0
bge_tophit16120	GACCTGAAGATGGACTCTTA	6	0
bge_tophit11759	AGATACAGAACCGGATAATA	9	0
bge_tophit19117	AATGTAGGAGATGGATCTTT	5	0
bge_tophit3775	CGAGAGGATTAAGGCGCACG	0	39
bge_tophit3776	ATACTGAAGGACGTTCTAGT	0	39
bge_tophit7641	TGGTGGAATATTAGGCATGACG	16	0
bge_tophit10879	ACAGGAGTTAGACTACGTCA	10	0
bge_tophit10870	ATTATGCTTGGACGGCAGAA	10	0
bge_tophit10871	TTGAACGGCAAGCAGAATTA	10	0
bge_tophit10873	AAATAGGAGCAGAATTAACA	10	0
bge_tophit10874	AAATTAAATCTGGATGGACA	10	0
bge_tophit10875	GATAGCAGGTTGGAAGAATT	10	0
bge_tophit20791	TGGATTAGGCTAGAAGCTTTTT	0	5
bge_tophit19312	AAAGCTTCTAGACCTGATGT	5	0
bge_tophit4209	AGATAGGATAGGAAGACGAC	34	0
bge_tophit2699	ATGATAGAAAATCTGGCAGAA	6	59
bge_tophit2696	AATGCGGTCTGGACGGGCTT	0	59
bge_tophit19975	CATAAGAGTTGGAGCAGAGG	0	5
bge_tophit19455	AATAACCAGCAGGACCGGATC	5	0
bge_tophit19400	TGCATACTGACGGAACAACC	5	0
bge_tophit12928	AAAGCGGAGAGAAAGGGATTC	8	0
bge_tophit10691	GATTGGAGCGGGAGGGCCCACGG	10	0
bge_tophit14378	ATGATAGAAAAGCTGGCCGAA	7	0
bge_tophit12838	AAAAAACTGGGACGTCATAT	8	0
bge_tophit19315	AGGTGACGTAATGACTATTG	5	0
bge_tophit19454	AGAATGCGGTCGGGACGGGAT	5	0
bge_tophit5342	AGAATGCGGCCTGGACGGGAT	0	25
bge_tophit5340	AAACAGACGTATTGAATATT	0	25
bge_tophit6040	AGATGGAATTATGATAGCAGAA	21	0
bge_tophit3184	AGCGGCATAAGCTCCAGACCT	48	0
bge_tophit16337	AACTGGAGTAGAAGGGATTA	6	0
bge_tophit16336	CGGGTGGTCGCTGGTTCAAG	6	0
bge_tophit16333	TTTCTGAATCCTGCATCTTA	6	0
bge_tophit19375	AATGGGAGGAATGATGTAAA	5	0
bge_tophit1313	TCATACGCAATGGATCGTCA	142	0
bge_tophit11726	ATGAGGAAAGTCCGGACACC	9	0
bge_tophit16028	TTCTCAAGAACTTTACACGGCA	6	0
bge_tophit19572	TTACGGAATTGAAGTAGCAGT	5	0
bge_tophit20584	AAAAAAGCTTCTAGACCCGATG	0	5
bge_tophit12728	TGCGTCGGAATAATACATAC	8	0
bge_tophit16164	AGAAGAAGTCGGACAATCTT	6	0
bge_tophit3407	AGTAAAAGCCTTTGTAGACG	44	0
bge_tophit3408	AAATGAGGAAAGTCCGGACA	44	0
bge_tophit3409	TTTGGGGAATGGGAGCGACG	44	0
bge_tophit10199	TGATGAAATAGAACCAGAAT	0	11
bge_tophit10198	TAAAAGCCTTTGTAGACGCA	0	11
bge_tophit14330	AGAAAACTTATGCATAGCTCA	7	0
bge_tophit10193	AGTAAAAGCCTTTGTAGACG	0	11
bge_tophit10192	ACCGTGGGCAATACTGGATT	0	11
bge_tophit10196	AAATCCAGCTGGGACCACCA	0	11
bge_tophit10195	ATAGACGATTTAGTAGTTTA	0	11
bge_tophit10194	AAAAGGAACTAGAGTGGATG	0	11
bge_tophit1555	AATATTGTAGCTGGAAGCATG	98	116
bge_tophit1551	AGATACGGCTTTAGAAGAGGC	116	0
bge_tophit8864	ACAAATTATACTGAAGGACG	13	0
bge_tophit8867	GAATGGAAAGAGGTGGGGCC	13	0
bge_tophit8866	AATGGAATTCAAGCAGATAT	13	0
bge_tophit8863	AAGGAGAAGTAGTTTGCATA	13	0
bge_tophit8869	ATAGAAATAGGAAGTGGATC	13	0
bge_tophit2117	TGGAATGAAAATAAGTATGGAG	79	0
bge_tophit12778	ATTGGGATGTATGGAAGTCG	8	0
bge_tophit1121	ATTTTGGAATTGGGGCAGATG	170	38
bge_tophit8441	TAAAGCGGACAGAAAGGGATT	0	14
bge_tophit18681	AGGAGCAGGAGGAGGTGGAATG	5	0
bge_tophit16450	ATACAGAAGCGGCTATTGATA	6	0
bge_tophit19310	ACATCTCGAACGCATCCTCT	5	0
bge_tophit19169	AGAAGGAAATATAGAATATA	5	0
bge_tophit19990	ACCTGTATCGTAAACGGACG	0	5
bge_tophit5934	TTAAAGCGGCGAGAAAGGGAT	0	22
bge_tophit5930	ACCTTAGAAGAAGTCGGACA	0	22
bge_tophit5932	AAATTTTGTAGCGACAGACA	0	22
bge_tophit338	AATGCGGTCTGGACGGGATT	0	772
bge_tophit10852	GTGGATCTGAAGCGGCTATT	10	0
bge_tophit4326	ACTGTAGGATTTACAGAAGA	0	33
bge_tophit2945	AGACTGCAAAGGATGCAAAG	53	0
bge_tophit2946	TGATTATTGAACGGCAAGCA	53	0
bge_tophit2943	ATAGCGTGAGGGGGATTTGA	53	0
bge_tophit11786	CGTAGGAATTAGAGGATTAC	9	0
bge_tophit14354	GGAATGGAAAGAGGTGGGGCC	7	0
bge_tophit14357	ATGAAAGAAAAGCTGGCAGAA	7	0
bge_tophit14353	TCTGAGAGGCGAAGAAGGACG	7	0
bge_tophit8326	AATGTGATAGTGGGGCATAC	14	0
bge_tophit8324	AATTAACGGCAGAAGATACC	14	0
bge_tophit8325	CAAGGATTAATAGCAGGAAT	14	0
bge_tophit12906	TGATAGGAACATAAGTAGAAG	8	0
bge_tophit12905	AGTAGAATTCGAATCAGAAGA	8	0
bge_tophit8329	AAAATATTTTCTCGGACTCA	14	0
bge_tophit4812	ATTAAAGCGGAGAGGAAGGGATT	12	29
bge_tophit19077	GAAAAAAGAATCGGAGGAGA	5	0
bge_tophit19345	ATAGATCGGATCAACAGAAT	5	0
bge_tophit5490	CAAGCAGATACGGGGACTAA	0	24
bge_tophit19292	TCATTAGAGGTTGCAGGAGG	5	0
bge_tophit19612	ATGATAGACAAGCTGGCAGAA	5	0
bge_tophit19290	AAATTTGGATTTAGGAGACA	5	0
bge_tophit18227	AAAAAAGAATCGGAGGATATAG	5	0
bge_tophit1377	TTAGAGCGTTGGATTCATAC	135	0
bge_tophit14328	CAAGCTGAACTACATCACACC	7	0
bge_tophit7230	AAATAGGGCATAGATTGATT	17	0
bge_tophit7233	TGGAGATGGATCAGTAGAAG	17	0
bge_tophit7234	AGAAGAGCATCTGTTTCACA	17	0
bge_tophit14324	AGTTTCCTCTAGACGAAGACG	7	0
bge_tophit16713	TTATCGGAACATAAGTAGAAG	0	6
bge_tophit19991	ATAAATGATCACGACAGGAC	0	5
bge_tophit19547	AGACTGCAAAGGATGCAAACC	5	0
bge_tophit16289	AGAAGACTATGAAAGAGCTT	6	0
bge_tophit19488	GAGCGGGAGGGACCACGGGGT	5	0
bge_tophit19483	ACGACTCCATACAAATTCTAT	5	0
bge_tophit19480	TGATAGGAAAAGCAAATGACA	5	0
bge_tophit16283	AAATGGAGAATGGCTGACTA	6	0
bge_tophit11848	CAAAATAATAAACGGCGAACA	9	0
bge_tophit11842	ATTTGAACGTATTGTAGCAGG	9	0
bge_tophit11843	TGGATATAGAATACGGATACC	9	0
bge_tophit11847	AAAATACAGAATTCGGAAGAC	9	0
bge_tophit11845	CTTATTGGAGGAGAAACGGCA	9	0
bge_tophit14162	GATTGGAGTATGGCAGAAAC	7	0
bge_tophit14163	AGATATAGATGTAGCTTTTG	7	0
bge_tophit14160	AGAAACGGAATGGAGATAAT	7	0
bge_tophit14167	TATGGAAAAGTAGCAGAAAA	7	0
bge_tophit14164	TATGCTTGGACGGCAGAAGA	7	0
bge_tophit14165	AGGATGCGTTCGAGATGTCGTA	7	0
bge_tophit14168	TAATAGGAATAGAATTGGCA	7	0
bge_tophit19566	GAATATCAGTCTCTGCAGAAA	5	0
bge_tophit15796	CAAGTATGGAAAAGAGCTGAAG	6	0
bge_tophit8848	GTATCAAAATCGTCGTTTAG	13	0
bge_tophit8847	AAGGAGCAGAAACTAAGACT	13	0
bge_tophit8845	GATTGATTTGTGTATGGACC	13	0
bge_tophit8843	CCTTAGAAGAAGTCGGACAA	13	0
bge_tophit8842	AATTCCGCGCGAGACTACCA	13	0
bge_tophit8840	TGTATTATTCCGACGCATAC	13	0
bge_tophit1143	GAAAAGGATTAACGAAGACA	166	0
bge_tophit6084	GTGGAATATTAGGCATGACG	21	0
bge_tophit6087	ATAGACGATTTAGTAGTTTA	21	0
bge_tophit7938	GAACGGCAAGCAGAATTATT	15	0
bge_tophit7939	AAAAACTATTGCAGCTGACA	15	0
bge_tophit19568	AAAAGGCACAGAGCGGAACAA	5	0
bge_tophit6336	AGCAGGAAGATCAGCTGAAG	20	0
bge_tophit6335	ACCACGTGGGCTGAAAGTGA	20	0
bge_tophit6333	GGATATAGAATACGGATACC	20	0
bge_tophit6332	ATTATACGGAACGGACATAC	20	0
bge_tophit6331	ACTATTAGCATAGCCGGACG	20	0
bge_tophit6338	AGCTAGAACTGCATCTAACG	20	0
bge_tophit7686	AGGAGGAGGTGGAATGGGAG	0	16
bge_tophit7687	AAAGCGAGAAACGGGAATTG	0	16
bge_tophit7688	AAACTGTAGCTTTAGCAGGAA	0	16
bge_tophit7689	ATGATAGAAAAGCTTGCAGAA	8	16
bge_tophit16414	AGAAGAAGTCGGACAATCTTG	6	0
bge_tophit16470	TCCTGTAATAATCCCAAGACG	6	0
bge_tophit19578	GAAGGGACTGCATTATTTTCA	5	0
bge_tophit4799	TGTGATATTAATTTGGGTTTTT	0	29
bge_tophit19142	AAAAGGACATGGAGGAAGAC	5	0
bge_tophit20700	AAATTTTTTAGCGTAGAAGATG	0	5
bge_tophit4302	AGGATAGAAAAGCTGGCAGAA	33	31
bge_tophit16412	CAAAAGAAAATGCAGAACACG	6	0
bge_tophit19127	AATAATAATGTGGAGCAGAA	5	0
bge_tophit4878	ACATAACGGGAGAAGGGCATAA	28	0
bge_tophit11850	GAAAAAAGAATCGGAGGATAC	9	0
bge_tophit1355	ATTGGGTGGACGACCGGATTCGA	138	0
bge_tophit17602	AGATTTTCAACAAGCAGATACGG	5	0
bge_tophit20065	AGCTGACGTAATGACTACTT	0	5
bge_tophit16674	ATACAAAACTGGAGGAACAA	0	6
bge_tophit7219	AAGGAGGATTATATTTATTT	17	0
bge_tophit7749	ATTGGGCAGAACAAGGAGTTTT	0	16
bge_tophit7216	GGTAGAGCGTTGGATTCATA	17	0
bge_tophit7215	ATATTGTAGCTGGAAGCATG	17	0
bge_tophit20067	AGAATTCGGATCAGAAGAAG	0	5
bge_tophit10955	AGTCTCGTAGCTCAGACGGGT	10	0
bge_tophit10953	TGAATAGATTGACGGAAGATG	10	0
bge_tophit15723	ACGTAGAGTTTGCAGGAGGCGGA	6	0
bge_tophit19600	AAGAAGGAGGACGACACACTC	5	0
bge_tophit19607	TGTAGAATAGGAATCAAATTA	5	0
bge_tophit16641	ATACTGAAGGACGTTCTAGC	0	6
bge_tophit16146	TGTATAGAGAGCAGAGGACT	6	0
bge_tophit16415	ATACTGAAGGACGTTCTAGTA	6	0
bge_tophit16416	CCACCGGAACTTGCAGCAGAT	6	0
bge_tophit16410	ATAGGAATTGGAGGAATGATT	6	0
bge_tophit17897	AGAGGCTGTATTAAGTACCGAAG	5	0
bge_tophit1519	AAAAAGCGAGAAACGGGAACC	44	119
bge_tophit8829	CAGATTGGTTAGAGTACACG	13	0
bge_tophit19341	AAAAGCAGAATTAACTCTAA	5	0
bge_tophit16459	CCGGGGGGTAGGCAGATAGAC	6	0
bge_tophit12730	AGGATTGACAGCTGCATCTG	8	0
bge_tophit8179	TGGAATGAAAATAAGTATGTAT	14	0
bge_tophit1167	ACTGTAGGATTTACAGAAGA	163	0
bge_tophit1168	GAAGGGATTATTTGCATTGACG	163	16
bge_tophit19401	AAAGAGACAGTAGGAGCATG	5	0
bge_tophit16643	ATGATTGGGATGGATGGAAA	0	6
bge_tophit19158	ACGATCAGATGGCAAAACTT	5	0
bge_tophit19291	CTTGCATTATAGGATTAGAC	5	0
bge_tophit6353	AAGTAGAAAAAGGTAAGCTCG	20	0
bge_tophit6357	AAAAAAGGGCGGCGACTTACC	20	0
bge_tophit6356	TGAATCAGGAGCGATTGAACA	20	5
bge_tophit7005	AAAATATTTTCTCGGACTCA	0	18
bge_tophit7001	AGATATCAAACGTCGGCATT	0	18
bge_tophit487	AGAATGCGGTCTGGACGGGAT	255	483
bge_tophit732	ACAAGCAGATACGGGGACTA	279	0
bge_tophit14308	TAAAGCGGAGAGAAAGGGAG	7	0
bge_tophit14394	TTTTTGTTCAAAGACTGCATT	7	0
bge_tophit20336	AATATTGTAGCTTGAAGCATG	0	5
bge_tophit3580	ATGATAGAAAAGCTGGCATAA	0	42
bge_tophit19972	TGATGAAATAGAACCAGCAG	0	5
bge_tophit5188	AAAATGATTCGGAAGCAGAC	0	26
bge_tophit6632	TTTTGTAGAAGTAGATGACG	19	0
bge_tophit6633	TCCTGGATTGTATGGCATAG	19	0
bge_tophit19976	AAATTAGGAAAGAAGACACA	0	5
bge_tophit19340	TAAAGGATTCGCATAGACGA	5	0
bge_tophit12052	ATTATACTGAAGGACGTTCTAG	6	9
bge_tophit16280	AAAATGAGGAAAGTCCGGAC	6	0
bge_tophit16287	AGGCTCGTAGCTCAGACGGT	6	0
bge_tophit7589	GAAAAGGAAGAGGTACTTGA	16	0
bge_tophit7583	CCTTTGGAAGTAGAAGGTTT	16	0
bge_tophit7581	AGAGACAGTAGGAGCATGGT	16	0
bge_tophit7587	TCTGGAAAAATAGAATCCGG	16	0
bge_tophit7586	ATGTGGAACGGGTACAGATG	16	0
bge_tophit7584	AATTGAAAAATTGTAGGATA	16	0
bge_tophit14389	ATCAAGTGGAGCAGGAGGACA	7	0
bge_tophit16668	CGCTGACGTAATGACTATTG	0	6
bge_tophit3071	AAAAAGGAGAAGTAGTTTGCATA	50	0
bge_tophit19444	TGATAGAAAAGCTGGCAGACA	5	0
bge_tophit19441	TACTAGCATACTCTATACTTA	5	0
bge_tophit10973	AGGAGCGGATGCTGCAGAAGT	10	0
bge_tophit10976	AGTAGAATTCGGATCAGAAGA	10	0
bge_tophit10979	TTAGAGCGTTGGATTCATACC	10	0
bge_tophit19629	TAGGAATAGAATTGGCAGATA	5	0
bge_tophit19622	ACATGCAGCAATGGAACCTCG	5	0
bge_tophit19620	ATGCGGGCTGGACGGGATTTG	5	0
bge_tophit19627	TTAAACCAGACGGGCATAGTG	5	0
bge_tophit16698	CTGGAAATAGTGGAGGGGCA	0	6
bge_tophit14131	ATTAAAAGAACCTGCAGAAC	7	0
bge_tophit14133	AGAGCTAAAAAACTGGGACG	7	0
bge_tophit10491	AGAAGGAGGACGACACACTCAA	10	0
bge_tophit1535	AATAGGAATAGTAGAAGACA	117	0
bge_tophit4115	GTTAGAGCGTTGGATTCATAC	35	0
bge_tophit4117	ATAGAGAGCAGAGGACTTATT	35	0
bge_tophit4113	CTTTTGTAGAAGTAGATGACG	35	0
bge_tophit3261	AAATAGGGCATAGATTGATT	0	47
bge_tophit7976	CGCACCCGTAGACGCAGGAAT	15	0
bge_tophit7974	GGAGCGGGAGGGACCACGGGG	15	0
bge_tophit17349	ATGGCATGGGACTGGATTATGT	5	0
bge_tophit938	ACTGGCTTGCGAGCAGAACA	207	0
bge_tophit19531	AGAAATGAATGCAGAACAGCC	5	0
bge_tophit6926	ACCACCGGAACTTGCAGCAG	18	0
bge_tophit4289	CGTGGTGAAAATGGTAGACA	33	0
bge_tophit2610	AGATATCAAACGTCGGCATT	61	0
bge_tophit2611	ATAGAGAGCAGAGGACTTAT	61	0
bge_tophit6622	AAGAAGGAGGACGACACACT	19	0
bge_tophit20008	AGAAAAGCTGGCAGAACAAC	0	5
bge_tophit5880	AGCTAAAAAACTGGGACGTCA	22	0
bge_tophit9425	AATGTGATAGTGGGGCATAA	12	0
bge_tophit9423	AATACGGTATAGAGGTTGAC	12	0
bge_tophit9421	CTGTCGCGTACGGACGGAAG	12	0
bge_tophit13033	ATTAGCGCTGATGGTACTGG	0	8
bge_tophit13035	AAGCCGGATTCTGTATTTAA	0	8
bge_tophit13034	AAGTTAATGATGTTGGATTT	0	8
bge_tophit13037	AGCGGAAAGAGTCATCATAG	0	8
bge_tophit13036	CGCATGGGGTCGCGGGTTCA	0	8
bge_tophit13038	AGGACTCATGAATGCAGAAA	0	8
bge_tophit8344	TGTTATAGGAATGGCAGGCG	14	0
bge_tophit8340	AATTATCTATCGTTGCAGAA	14	0
bge_tophit8348	AGCGGAAAGAGTCATCATAG	14	0
bge_tophit8349	AGAAGGAATATATGAACACT	14	0
bge_tophit16371	ATTGAAGGGACTGCATTATTT	6	0
bge_tophit18418	ATAAGCAGATAAAGTAGCAACA	5	0
bge_tophit1643	ATGATAGAAAAGATGGCAGAA	107	0
bge_tophit1641	AGAAGACTTTTGATCATGAA	107	0
bge_tophit6618	AAGAGGATGCGTTCGAGATG	19	0
bge_tophit9439	AAAATAAATCGGGGTGACTG	12	0
bge_tophit19281	TCCATGGGAATGAGTAGAGA	5	0
bge_tophit10885	CTTTAACTCATTGGGCAGAA	10	0
bge_tophit14182	TGAGACTGAAAGAACAGCAT	7	0
bge_tophit1445	AAAAAAGGGCGGCGACTTAC	126	0
bge_tophit234	ACAAGCAGATACGGGGACTAAAA	1135	0
bge_tophit16520	TTTAGAGTTACTGTAGCAGATG	6	0
bge_tophit10918	AAAAAGGCACAGAGCGGAAC	10	0
bge_tophit10912	TGAAAGCTAAAGTAGGAACA	10	0
bge_tophit10910	AGCTATAGAGTCTACGGCCA	10	0
bge_tophit580	GTTAGAGCGTTGGATTCATA	0	379
bge_tophit16770	CTTAACGGAAAAGAAAGATTT	0	6
bge_tophit19393	AGGGATTATTTGCATTGACG	5	0
bge_tophit19390	TGAAGGAATAGAGCATATCA	5	0
bge_tophit19391	AGGAGGAACAGAAAACATAA	5	0
bge_tophit20059	ATAGAGAACAAGGAGGAACA	0	5
bge_tophit20058	AATGCGGTCTGGACGGGACC	0	5
bge_tophit20051	ATTGTAAGATTCGTAGGTAA	0	5
bge_tophit20050	AAGTAGATAACGGAATATTA	0	5
bge_tophit19242	AGACCTGAAGATGGACTCTG	5	0
bge_tophit20057	AAAACGAATATCAGGACTAT	0	5
bge_tophit19246	AATAAGAAGCAGAACTCCAA	5	0
bge_tophit12813	AAATTAACGGCAGAAGATAC	8	0
bge_tophit3244	CCACCGGAACTTGCAGCAGA	47	0
bge_tophit3245	CTGGATGAAATTGAACGGCA	47	0
bge_tophit3249	ATGATAGAAAAGCTGGAAGAA	47	0
bge_tophit7957	ATTGAAGGAAGGCCTACTGA	15	0
bge_tophit7950	ACTAGCATACTCTATACTTA	15	0
bge_tophit7951	ATTTAAAATAGGAGCAGAAT	15	0
bge_tophit7958	TTTAAAATAGGAGCAGAATT	15	0
bge_tophit7959	ATAGAGAACAAGGAGGAACA	15	0
bge_tophit19538	GCGGGAGGGACCACGGGGTCA	5	0
bge_tophit16182	AGCTAGATAAGGATACTCCA	6	0
bge_tophit16183	ATTATGTCATGGAAGGAGCA	6	0
bge_tophit16180	AGTAGCAAAACTGATTATTT	6	0
bge_tophit16184	AAAAAATTCGTGGGGCACTG	6	0
bge_tophit16188	TATGGAAAAGAGCTGAAGAA	6	0
bge_tophit16189	GAATGAGCAGGAAGAACTTG	6	0
bge_tophit1075	TGGAATTTAAATAATTATTGAG	178	0
bge_tophit12804	TCATTCAATTTGTCGGTATA	8	0
bge_tophit4739	TTTTGGATCGCTCGGCAACG	29	0
bge_tophit2679	AAATTTATTATAGCGGACGGCG	59	0
bge_tophit20718	ATCAGTCTCGTAGCTCAGATGG	0	5
bge_tophit3814	TCGATTAGGATAGAAGCTTTCT	38	0
bge_tophit13059	AGAGAATTTAAAGTAGAAGTG	0	8
bge_tophit19541	AGAAGGAATGAAAGGTGCTAT	5	0
bge_tophit14187	ATACGGAAAATCTGAGGTTA	7	0
bge_tophit19185	AGCAGAAATCGGAGAACCAA	5	0
bge_tophit19181	TTATCGGTTATAGAGGATTA	5	0
bge_tophit19180	CGGGGTGAAAATGGTAGACA	5	0
bge_tophit18163	AGAAATGAATGCAGAACAGCGGA	5	0
bge_tophit19299	AAATTTATTATAGCGGACGC	5	0
bge_tophit12890	TAAGATCGAATTAATAGGAGA	8	0
bge_tophit12892	TTCTCCAGGAGTAGCAGAACC	8	0
bge_tophit9415	TATGGAAAAGAGCTGAAGAC	12	0
bge_tophit9413	TTTGTTCAAAGACTGCATTT	12	0
bge_tophit9412	ATACGAACTCCTAGGGATAT	12	0
bge_tophit9411	ATTGAAGGGACTGCATTACC	12	0
bge_tophit9410	ATATTTGTTTATGGTGGACG	12	0
bge_tophit4890	AAATATCCAGAAGACTCTCCCG	28	8
bge_tophit10963	TAAATAGGGCATAGATTGATT	10	0
bge_tophit16378	ATGGAAGAGGGGACTGTAATA	6	0
bge_tophit19434	CAACGGAATACGGCCTTTGTG	5	0
bge_tophit12370	AAATATGTAGGAATGAGCAGAAA	8	0
bge_tophit3033	GCTAAAGTGCGGGCGAAGGGAT	51	41
bge_tophit3036	AAAGGACTTGAATGGCTTCA	51	0
bge_tophit216	CATAAAAAAGCTTCTAGACCTGA	1256	0
bge_tophit14661	AGAATGCGGTCTTGACGGGAT	0	7
bge_tophit10935	AGACTGAGTGATAGGTTTTC	10	0
bge_tophit10931	AGTAAGTAAAACTGAAGTCA	10	0
bge_tophit10933	CAATGACAGAAGCTGTAACT	10	0
bge_tophit10932	TCTGATATAATTAGCGGACG	10	0
bge_tophit19408	TGATTATGAATGCGGATAGA	5	0
bge_tophit10939	CGTAATATTGTAGCTGGAAG	10	0
bge_tophit10938	ATAGGAGACATAGGCATTCG	10	0
bge_tophit16793	AAAATCATGCACGGACGGTTA	0	6
bge_tophit1866	AAATTTAAAATAGGAGCAGAA	93	22
bge_tophit1865	AGTCTCGTAGCTCAGACGGT	93	0
bge_tophit14559	TAAAATAGGAGCAGAATTAA	0	7
bge_tophit20030	ATGATCCTGATCGAAAGACG	0	5
bge_tophit20035	AGATACGGCTTTAGAAGATG	0	5
bge_tophit16423	TAAACCAGACGGGCATAGTGA	6	0
bge_tophit16425	AGTTCCATCAGAAGCTGGACG	6	0
bge_tophit16427	AAATTAACGGCAGCAGATATG	6	0
bge_tophit17956	GGGCTGCGCGTCAAGCTATAGAA	5	0
bge_tophit10067	AATACGGTATAGAGGTTGAT	11	0
bge_tophit5571	AAAGCAGAAGAACTAGTTGATA	23	0
bge_tophit5578	AGATTGAATTCTAGCCGAAGTCG	23	0
bge_tophit14171	TAGAAAAGCTGGCAGAACAC	7	0
bge_tophit12793	AAATCCAGCTGGGACCACCA	8	0
bge_tophit12792	AAAAGAAAAATCAGCGGAAG	8	0
bge_tophit12790	ACGCGACCTCGAAGGGACCC	8	0
bge_tophit12797	GGCAGGCGTATTAGATTCTA	8	0
bge_tophit12795	CAAATTTTGTAGCGACAGAC	8	0
bge_tophit12794	AGGAACATAAGTAGAAGGCC	8	0
bge_tophit18335	AAATTTTGTAGCGACAGACACT	5	0
bge_tophit7982	AAAAAAGAATCGGAGGATACC	15	0
bge_tophit2246	CGTGTGGTCGCTGGTTCAAG	73	0
bge_tophit2245	AATTAACGGCAGAAGATATG	73	0
bge_tophit2244	GATACGGCTTTAGAAGAGGC	73	0
bge_tophit6103	AAGTAGAAGGCCTTCCTACC	21	0
bge_tophit19121	AAAATCTTTGACGGCATTTT	5	0
bge_tophit6793	ATTAAAGCGGAGAGAAAGTGATT	0	19
bge_tophit18881	AAGCGGAGAGAAAGGGATTCAA	5	0
bge_tophit3833	AAATTAACGGCAGAAGATACC	38	0
bge_tophit19219	GATGTAGAAACAGGATTTGT	5	0
bge_tophit13071	ATGATAGAAAAGCTGTCAGAA	0	8
bge_tophit19212	AAGCGGAGAGAAAGGGACAA	5	0
bge_tophit10476	AGATACTCAAGCTAGAAGACTCA	10	0
bge_tophit5293	ACAAGCAGATACGGGGACTAC	25	0
bge_tophit5294	TGATGAAATAGAACCAGAAGT	25	0
bge_tophit5297	TTTTGCGGAGAGAGAGGGATT	25	0
bge_tophit5296	TTGATTGGGGAGATGACTTTA	25	0
bge_tophit2016	TGTAATGTACATAAGTATTTTC	0	85
bge_tophit6928	CAAGTCGAAACAGGTTCTTC	18	0
bge_tophit9479	CCACCGGAACTTGCAGCAGAC	12	0
bge_tophit9473	ATGCTTGGACGGCAGAAGATG	12	0
bge_tophit9472	TCGATTAGGCTAGAAGCTTTA	12	0
bge_tophit9477	TTCAGACGTCAAAAATTCACA	12	0
bge_tophit19211	TCCTGGGGCTGAAGAAGGTC	5	0
bge_tophit14327	AAAAAAGGGAGGCGACTTACT	7	0
bge_tophit7291	GATTGGAGAGGGAGGGACCACGG	17	0
bge_tophit16229	AAAGCGAGAAACGGGAACCA	6	0
bge_tophit10860	AATGAGCGGATAGACCAGCA	10	0
bge_tophit1840	AAAATTTATTATAGCGGACG	94	0
bge_tophit1846	AAAATAGGAGCAGAATTAACA	9	94
bge_tophit4500	ACACGTAGAGTTTGCAGGAG	31	0
bge_tophit4501	CAAGCAGATACGGGGACTAA	31	0
bge_tophit4507	ATTGTACCCACGACTGGATTT	31	0
bge_tophit20011	ATTCAATTTGTCGGTATAAT	0	5
bge_tophit20012	CATGCGGTCTGGACGGGATT	0	5
bge_tophit1598	AAAATACAGAATTCGGAATA	111	0
bge_tophit1599	CGCATGGGGTCGCGGGTTCA	111	0
bge_tophit19338	AAATGGGAAAAGAGGACACT	5	0
bge_tophit10049	CCGGGGGGTAGGCAGATAGC	11	0
bge_tophit10048	AAAATTAACGGCAGAAGATA	11	0
bge_tophit10047	AGAAGTTGGCAACTGGGAAC	11	0
bge_tophit20967	CATAAAAAAGCTTCTAGATCTGA	0	5
bge_tophit19449	AATAAAAACGAGAGAAGGACG	5	0
bge_tophit953	GATAGAAAAGCTGGCAGAAC	0	203
bge_tophit1030	AAAATACAGAATTCGGAATA	0	188
bge_tophit1035	GATAGAAAAGCTGGCAGAAC	187	0
bge_tophit1034	AGACCTGAAGATGGACTCTT	187	0
bge_tophit20220	AAAATAGGAGCAGAATTAATA	0	5
bge_tophit8436	GAAAAGGATTAACGAAGACA	0	14
bge_tophit6610	AAAAAGAATCGGAGGATAAC	19	0
bge_tophit6612	AATTATATTAGCTGGAGAAG	19	0
bge_tophit20044	AAAAGAACATACGTAGGATA	0	5
bge_tophit9435	TTTAGGATTATCTGCAAAAG	12	0
bge_tophit9434	TCAATGATCGATTGGACATA	12	0
bge_tophit9437	ATACGAACTCCTAGGGATAC	12	0
bge_tophit9431	AGAAGGAGAAGGAGGTAGGC	12	0
bge_tophit9433	AAGCGAGAAACGGGAATTGA	12	0
bge_tophit19231	ATTATGGCTACTGGAAGAAG	5	0
bge_tophit19230	GAAAATAAATCGGGGTGACT	5	0
bge_tophit19234	AAATTCTAGTAGAAGCCGTT	5	0
bge_tophit19237	AAGTTAATGATGTTGGATTT	5	0
bge_tophit19239	ATACAAAACTGGAGGAACAA	5	0
bge_tophit14204	GCAGGAAGATCAGCTGAAGA	7	0
bge_tophit12932	TGGAATGAAAATAAGTATTTAG	8	0
bge_tophit9451	ACTGTAAGAACCGGATTCTA	12	0
bge_tophit9450	AATAAGGGAGTCGTTGCACG	12	0
bge_tophit9455	TTTAAAAGGAATTCCAGAAG	12	0
bge_tophit9454	AAATTGGATAGTATCGGATA	12	0
bge_tophit11723	GTAATAAGAAGCAGAACTCC	9	0
bge_tophit11722	GATAGGATAGGAAGACGACG	9	0
bge_tophit18787	CGAGAGGAAGGTGGGGACGACGT	5	0
bge_tophit14304	CGACGGGGAGGTTCGGCACC	7	0
bge_tophit8954	AGAATGCGGTCTGGACGGTAT	0	13
bge_tophit14303	CCAGTAAACGGCGGCCGTAA	7	0
bge_tophit14300	AATAGCATCTACGGATTCTA	7	0
bge_tophit9900	AAGCCTTTGTAGACGCAACTCC	11	0
bge_tophit3342	AGTCGAGAGGAAGGTGGGGACG	45	25
bge_tophit10892	TATTAGCATAGCCGGACGTT	10	0
bge_tophit10893	TAACGGTAGCACAGCAGATT	10	0
bge_tophit16203	TTGTATTGGACAGGCAGAAA	6	0
bge_tophit16205	AAATTGAACGGCATAAATTT	6	0
bge_tophit16208	TATGCGGATTGACTGCTACA	6	0
bge_tophit19275	AAAACTGGAACGGCTCAAAA	5	0
bge_tophit10201	AGAAGAAGTAGATATCCATA	0	11
bge_tophit10200	AAAAAGGTAGACCTTCATTT	0	11
bge_tophit10206	ATTGGTGCAGATGGAATCATT	0	11
bge_tophit14565	AAAATCAGAAACCGGGCTAC	0	7
bge_tophit14563	ATTTAAAATAGGAGCAGAAT	0	7
bge_tophit16197	CTGTAAGAACCGGATTCTAT	6	0
bge_tophit14568	ATCGGGGTAGCAGGATTTGA	0	7
bge_tophit14569	AAAATCAGAAAGACTAGTCA	0	7
bge_tophit16199	TGCCGGAGCAGAAGTTACTG	6	0
bge_tophit16551	CAACTGAAGAACCATACCCACA	6	0
bge_tophit16168	AGGAGATTGGTGGAAAGTTT	6	0
bge_tophit9020	CATAAAAAAGCTTCTATACCTGA	0	13
bge_tophit4753	AAATACAGAATCCGGCTTATA	29	0
bge_tophit4752	AGATTGATTTGTGTATGGACC	29	0
bge_tophit4751	AGACGATCAGATGGCAAAACT	29	0
bge_tophit16690	AAATAGAATCTGAATTCGGC	0	6
bge_tophit16696	AATGGAATTCAAGCAGATAT	0	6
bge_tophit16697	ATAGAAATAGGAAGTGGATC	0	6
bge_tophit16695	GAATAGCAAGTAGAAACTCC	0	6
bge_tophit19162	TAAAATAGGAGCAGAATTAC	5	0
bge_tophit5808	AGACTGCAAAGGATGCAAAGTCG	22	0
bge_tophit12755	AAAACGGAACTACATCTGAC	8	0
bge_tophit19251	AAAAAGGAGAGGGAGCTACC	5	0
bge_tophit19154	AATCCAAAGACAGTACAACG	5	0
bge_tophit10140	AAAATGGAATTCAAGCAGATA	11	0
bge_tophit11943	ATCGTGTAGATGACGCATTA	0	9
bge_tophit14198	ATAAAAACGAGAGAAGGACG	7	0
bge_tophit8033	AAATATAGGCATAAGAAACG	0	15
bge_tophit8035	AAAGCGGAGAGAAAGGGCTT	0	15
bge_tophit8039	ATGGAACAGGTGTAGCGTTAG	12	15
bge_tophit14228	ACGGAGCAATGATAGCCATT	7	0
bge_tophit14223	AAAGTAGTTGAAGATTCTGG	7	0
bge_tophit14225	AATCAGTAGACCAAGACATT	7	0
bge_tophit14227	AGTATCAAAATCGTCGTTTA	7	0
bge_tophit14534	ATACACAGAATGATGGCTCG	0	7
bge_tophit20353	AATATTGTACCTGGAAGCATG	0	5
bge_tophit14359	AATTTCATTGACTGTCGATCA	7	0
bge_tophit14536	CTGTGTAGAATTTGCAGAAA	0	7
bge_tophit12817	ACAAGGAGATAGAGAAGTTG	8	0
bge_tophit12811	AGGACTCATGAATGCAGAAA	8	0
bge_tophit3093	ACAAATAGAACCGGTTTTTA	0	50
bge_tophit19987	ATGTAGAATTAGAGCACAAG	0	5
bge_tophit7786	GAAGGGATTATTTGCATTGAAG	15	0
bge_tophit855	AAAAAGGGCGGCGACTTACT	235	0
bge_tophit16261	ATTAAAAAATACAGGACTCA	6	0
bge_tophit16260	AAATGGAGCAGATAGACAAG	6	0
bge_tophit16264	CTGTCGCGTACGGACGGACC	6	0
bge_tophit10105	AGAAAAGCTGGCAGAACACC	11	0
bge_tophit1804	ACTCCGGCAACTCTCCCAAAG	96	5
bge_tophit19986	AACAGGAGAAATAGATGTAG	0	5
bge_tophit10883	AAATGAATTATGCTTGGACG	10	0
bge_tophit14555	CGAGCACGGATATCGCATTA	0	7
bge_tophit16127	CTACTTATCGCGGCTTCACT	6	0
bge_tophit10080	AGATAGAGCTTGTGTAGAAG	11	0
bge_tophit10085	TGGAATAGAATATGCAGAAA	11	0
bge_tophit10084	AAATAATAAACGGCGAACAA	11	0
bge_tophit10086	CAATGCATACTGACGGAACC	11	0
bge_tophit10088	ATGGAACAGGTGTAGCGTTA	11	0
bge_tophit14553	ACTGCGGTCTGGACGGGATT	0	7
bge_tophit13286	GAAATAGGATTAGCAGAAGAGA	7	0
bge_tophit8946	ATTAGGACGGGACACGGGAA	0	13
bge_tophit8947	ACTATTAGCATAGCCGGACG	0	13
bge_tophit20054	GATAGAAAAGCTGGCAGACC	0	5
bge_tophit19514	ATAAGACGACACTTCAGAATA	5	0
bge_tophit1789	CGAGAGGATTAAGGCGCACG	97	0
bge_tophit19492	TAAGAAGCAGAACTCCAATCT	5	0
bge_tophit6112	AAAAATATTTTCTCGGACTCA	21	0
bge_tophit6060	ATTGGTAGAAGGTTGGATTCGTT	21	7
bge_tophit6065	CATAAAAAAGCTTCGAGACCTGA	21	10
bge_tophit6614	CACGTGGAAGTGAGAAGTCG	19	0
bge_tophit16277	CCGATAGGGACCCAGGGACC	6	0
bge_tophit9544	AGAAACGGAAGAACTTGTAT	0	12
bge_tophit9547	AAAAGAAGCAGTAGAATATA	0	12
bge_tophit7330	GCTGGATTTTTAGCAAGACG	0	17
bge_tophit7331	GATAGAAAAGCTGGCAGCAC	0	17
bge_tophit7334	AAAGCGGAGAGAAAGGGACA	0	17
bge_tophit7335	AGAAGGAGTAGTAGAAGATG	0	17
bge_tophit7337	ATAGATCGGATCAACAGAAT	0	17
bge_tophit5868	CGGGGTGTAGCTCAGATTGG	22	0
bge_tophit5869	TAAGGAGCAGAAACTAAGACT	22	0
bge_tophit5861	GAAGACAGCTTCTGAAACTA	22	0
bge_tophit5866	AAAACGAACACGAGCTACTT	22	0
bge_tophit5865	AGACTGCAAAGGATGCAAAC	22	0
bge_tophit20029	AGTGTTTGGAGGAGGCTTTA	0	5
bge_tophit448	AGCTGACGTAATGACTATTG	546	0
bge_tophit3544	ATTAAATCACAAACAGAACACGC	42	0
bge_tophit3548	CTATGGAAAAGTAGCAGAAT	42	0
bge_tophit16844	AGTCTCGTAGCTCAGACGTTT	0	6
bge_tophit19276	CAAGCAGATACGGGGACCCA	5	0
bge_tophit19272	AGAGTGAATTTTGGCGGATT	5	0
bge_tophit13027	AAAAGCGAGAAACGGGAATT	0	8
bge_tophit20236	AAAATTAGGAGAAGAAGCTGT	0	5
bge_tophit13023	AATACAGAATCCGGCTTATA	0	8
bge_tophit10143	AGAATTCTAAGAAGACGAACT	11	0
bge_tophit12818	AGAGGATTTGAAGGAGGGCA	8	0
bge_tophit14246	AGGAGCGGATGCTGCAGAAG	7	0
bge_tophit14245	ATTATTGATACGGCTGGAAG	7	0
bge_tophit8356	ACTATGGAAAAGTAGCAGAA	14	0
bge_tophit5279	ACGTAGAAAATTTGGGGTTT	25	0
bge_tophit8358	AGATTGAATTCTAGCCGAAG	14	0
bge_tophit9769	CTGTGGCAAGAAGGACATACTG	11	0
bge_tophit4902	TGTAATGGACAAAGGGAAGCA	0	28
bge_tophit16642	ATAGAGAGCAGAGGACTTAT	0	6
bge_tophit19380	AAATTTTTTAGCGTAGAAGA	5	0
bge_tophit16644	AGCAGAAGAACTAGTTGATA	0	6
bge_tophit16647	AGAAAAGCTGGCAGAACAAT	0	6
bge_tophit10878	TTTTATCGTTTTTAAGGGCC	10	0
bge_tophit14286	TCCGGAAGTGACAACAGGCG	7	0
bge_tophit16112	AAGCTGAACTACATCACACC	6	0
bge_tophit19521	ATTCTTCGATTAGGCTAGAAG	5	0
bge_tophit19170	AGTCTCGTAGCTCAGACGGG	5	0
bge_tophit19520	GAACGGCAAGCAGAATTATTA	5	0
bge_tophit16249	TAATGGATCAGGAAGCCGCT	6	0
bge_tophit16248	TGCTGGGATTGGAGGTATAG	6	0
bge_tophit1199	ATTGTACCCACGACTGGATT	158	0
bge_tophit1190	GAAAAAAGAATCGGAGGATA	159	0
bge_tophit1191	CGCATGGGGTCGCGGGTTCC	159	0
bge_tophit4650	TTTTGCGGAGAGAGAGGGAT	0	30
bge_tophit2430	GTATGGAAAAGAGCTGAAGA	66	0
bge_tophit16247	AAAACGAGAGAAGGACGTCC	6	0
bge_tophit381	TCAACAAGCAGATACGGGGACTA	0	679
bge_tophit2554	ACAAAGGAAGAAGGAGGACG	0	63
bge_tophit16242	ATGCGGTCTGGACGGGATAA	6	0
bge_tophit11047	AGAAATGAATGCAGAACAGC	0	10
bge_tophit11045	ATTCTATAGTTCGTGGGACC	0	10
bge_tophit11739	CTTCTATAATGGGATTGTAC	9	0
bge_tophit19593	AAAACAATTGGAAGCAGCTCG	5	0
bge_tophit12759	ACAGGTATCAGGACTAATTT	8	0
bge_tophit15928	TCGATTAGGCTAGAAGATTTCT	6	0
bge_tophit12756	AGAGGAAGGTGGGGACGACG	8	0
bge_tophit8220	AAAAGAATTACATAAGAACGGCC	14	0
bge_tophit11957	ACTATGGAAAAGTAGCAGAA	0	9
bge_tophit11958	AGAAGACTTTTGATCATGAA	0	9
bge_tophit12753	TTTGGATAGCAGGTTGGAAG	8	0
bge_tophit1426	AAATATAGGCATAAGAAACG	129	0
bge_tophit19269	AATTTTTGACTTAGCTGAAG	5	0
bge_tophit14203	TCCAGCAAAAACAGTAGAAG	7	0
bge_tophit7329	ACTGGCTTGCGAGCAGAACA	0	17
bge_tophit7328	AAATCCAGTCGTGGGTACCA	0	17
bge_tophit7327	TCCTGGATTGTATGGCATAG	0	17
bge_tophit7326	ATGAGGAAAACGGAACTACA	0	17
bge_tophit16380	AAAAAATAAAGGAGTAGGTCT	6	0
bge_tophit16381	TAATGGATTCAGAAGCAAAAG	6	0
bge_tophit16384	AAATGGGGAGAGCAGGATTCG	6	0
bge_tophit12739	AGAACCATCGTGCACTCTTT	8	0
bge_tophit12888	ATGATAGAAAAGCTGGCTGAA	8	0
bge_tophit16186	AGATGGATACAAGAAAATAA	6	0
bge_tophit6600	CGTAATATTGTAGCTGGAAGCAT	19	0
bge_tophit16658	AAAGGACTTGAATGGCTTCT	0	6
bge_tophit16657	AAAGCTGGAGAACAGGCTAA	0	6
bge_tophit16654	ACTATAAATAGTCGGATGTT	0	6
bge_tophit16655	AAAAGGAGGAAGAGGATGCG	0	6
bge_tophit16650	AAAATAAGACTGGGTAGTTC	0	6
bge_tophit5840	GGTTAAATACAGAATCCGGCTTA	22	0
bge_tophit5842	AGAAGACTTTTGATCATGGCGGA	22	0
bge_tophit5843	GATAGTCAAGCAGAAATCGGAGA	22	0
bge_tophit5849	AAAAACTGGGACGTCATATA	22	0
bge_tophit19923	AGAAGAAGGAGAAGGAGGTAGGC	0	5
bge_tophit2558	AAAATCATGCACGGACGGTAA	0	63
bge_tophit12543	CGTAGTAGAAGCAGAAGTTATG	8	0
bge_tophit19309	AAAACTGTGAACAAGCTAAC	5	0
bge_tophit19303	AAATATCGTACGGCTTACCA	5	0
bge_tophit12925	GAGAAATGAATGCAGAACAGC	8	0
bge_tophit14263	AGTAGGACTATAAGCCGGAT	7	0
bge_tophit12920	TGATACGGTAGTAGAAATAGG	8	0
bge_tophit11735	GCTAAAGTGCGGGCGAAGGC	9	0
bge_tophit11730	GAATTATGATAGCAGAACCT	9	0
bge_tophit11731	AGGAATAGTTCGTTGTGATA	9	0
bge_tophit11732	TTTAAAATGCAAGACGGATA	9	0
bge_tophit11733	TAGGAGATGAAGGTGGATTT	9	0
bge_tophit13120	AAAATTAGCAGGAGGAGTAGCA	0	8
bge_tophit12837	CGTGGGACCACCAGTCGTCG	8	0
bge_tophit12831	AAGTAGATAACGGAATATTA	8	0
bge_tophit4921	CATAAAAAAGATTCTAGACCTGA	20	28
bge_tophit19597	AAATGTGATAGTGGGGCATAA	5	0
bge_tophit2184	ACAAATAGAACCGGTTTTTA	76	0
bge_tophit19523	TGGACCTGGATTCAGCATTCG	5	0
bge_tophit2458	GAATAGCAAGTAGAAACTCA	65	0
bge_tophit2459	AGACTGAAAGAACAGCATAA	65	0
bge_tophit19261	AGGACAAGATGAAGCAGTAG	5	0
bge_tophit11718	TTATGCTTGGACGGCAGAAG	9	0
bge_tophit11719	ATGTGATCAAAGACGCAGAA	9	0
bge_tophit11716	AACAGGAGAAATAGATGTAG	9	0
bge_tophit19265	AATTGGGGCAGATGGAATCA	5	0
bge_tophit11712	GAATCGGTAAAAGCAAGACA	9	0
bge_tophit16187	ACAATTGTAGAGAAACAGTA	6	0
bge_tophit3911	AGAGACAGTAGGAGCATGGTA	37	10
bge_tophit15701	AGAATGCGGTCTGGACGTCGTA	6	0
bge_tophit11976	CTATGGAAAAGTAGCAGCATT	0	9
bge_tophit7626	AGGATGGAAAAGAGCTGAAGA	16	0
bge_tophit14266	AATAGGATTAGCAGAAGAGA	7	0
bge_tophit7627	CAGTAAAAGCCTTTGTAGACG	16	0
bge_tophit19457	AGGATAGAAAAGCTGGCAGAC	5	0
bge_tophit8975	TGAAAGCGGAGAGAAAGGGTT	0	13
bge_tophit16279	ATACTCCATTCCCTGTAGTG	6	0
bge_tophit8600	ATGAAAGCGGAGAGAAAGGGATT	13	0
bge_tophit3681	AGATAGGATAGGAAGACGACG	40	11
bge_tophit14262	TTCAGCGGAGGAAGCAATCG	7	0
bge_tophit19102	GCGCGGGATGGAGCAGTTGG	5	0
bge_tophit5158	ACTAGGGGAGGGAGCAAACG	26	0
bge_tophit5150	AGACTGCAAAGGATGCAACC	26	0
bge_tophit7370	CATAAAAAAGCTTCTAGCCCTGA	0	17
bge_tophit16639	TACAGCGGAGAGAAAGGGAT	0	6
bge_tophit9462	AGTAGCGGAATAGGAATAGA	12	0
bge_tophit12746	TATGTAGGAATGAGCAGAAA	8	0
bge_tophit12742	AATGTAGAATAGGAATCAAA	8	0
bge_tophit9463	AAATAGGAATTGGAGGAATG	12	0
bge_tophit10404	ATAAATAGCGTGAGGGGGATTTG	5	11
bge_tophit10361	TAAAAAGCTTACTCTTGTAAGCT	0	11
bge_tophit15626	TGATTATTGAACGGCAAGCAGA	6	0
bge_tophit11950	GATAGAAAAGCTGGCAGAAT	0	9
bge_tophit19369	TCATATAGGAGTAGCAGTAG	5	0
bge_tophit11951	TCATACGCAATGGATCGTCC	0	9
bge_tophit11955	AAGTAGCGGAATAGGAATAG	0	9
bge_tophit19544	TTATAAAAAGTGAAGCGGAAG	5	0
bge_tophit19445	CCATAGGATTAGGAGACGTCA	5	0
bge_tophit11940	AGTAGCGGAATAGGAATAGA	0	9
bge_tophit14284	ATCGGGGTAGCAGGATTTGA	7	0
bge_tophit14281	GGACTTGAATGGCTTCATCA	7	0
bge_tophit11947	AATTGAAAAATTGTAGGATA	0	9
bge_tophit9122	AAATTGAATTACGCAGAGACCTC	12	0
bge_tophit14383	ATGATATAAAAGCTGGCAGAA	7	5
bge_tophit14526	CATAAAAAACCTTCTAGACCTGA	0	7
bge_tophit12858	ATAGCAGGTTGGAAGAACAA	8	0
bge_tophit12850	TGGTTAGAGCGTTGGATTCA	8	0
bge_tophit12851	TAAGGGATTCTAGCATCACG	8	0
bge_tophit12854	ACTAAAAATATCGGAAGACA	8	0
bge_tophit12856	AGACCAGAAACGGAAGAACT	8	0
bge_tophit5097	AGCAGAAATCGGAGAACCCATTG	26	0
bge_tophit12311	TGTTATAGATCGTATTGTTCCT	8	0
bge_tophit16335	TACAGAAGCGGCTATTGATA	6	0
bge_tophit19423	ATACGGCAAACTTTCTATGT	5	0
bge_tophit835	TTTAGAGTTCCTGTAGCAGATG	241	9
bge_tophit9235	TGGAATGTAAAAAATAATGGAG	12	0
bge_tophit4619	CCGGGGGGTAGGCAGATAGA	30	0
bge_tophit4613	AACGGCAAGCAGAATTATTA	30	0
bge_tophit4610	AAATTAATATCAAAGACGCA	30	0
bge_tophit4617	AAATGTGATAGTGGGGCATA	30	0
bge_tophit4615	AAAAAGGCACAGAGCGGAAT	30	0
bge_tophit2471	AAAAAAGGGCGGCGACTTAC	0	65
bge_tophit2472	AAAAGCTTCTAGACCTGATG	0	65
bge_tophit1261	ATGATAGAAAAGCTGGCAGA	149	0
bge_tophit1262	TAAAGCGGAGAGAAAGGGAT	149	0
bge_tophit16179	ATAAATGGAGCAAGCTGAAC	6	0
bge_tophit16175	AATAGGAGAGTTTGCAGAAA	6	0
bge_tophit16170	GGAAAAGGATTGCGTTTATA	6	0
bge_tophit11779	TCTGGGAGAATTAGGATAAA	9	0
bge_tophit11770	CGGAGTGTAGATGCGGGAGC	9	0
bge_tophit11775	GAGTGAATTTTGGCGGATTA	9	0
bge_tophit11776	AGGACTATAAGCCGGATTCT	9	0
bge_tophit11777	AGATGAGGAATAGTGCAACA	9	0
bge_tophit3707	TTTGATTTTCATTTTTGCTTTCC	0	40
bge_tophit19502	AAAATTAATATCAAAGACGCA	5	0
bge_tophit10767	AGGAAAGAAAAGAAGATAGGAG	10	0
bge_tophit19086	AAGAAGTATACGAACCTGGC	5	0
bge_tophit19087	GATTGGGGAGATGACTTTAC	5	0
bge_tophit19084	AGAAGTAGAACGGGAAAGCC	5	0
bge_tophit19081	CGAGAGGAAGGTGGGGACGA	5	0
bge_tophit20041	ATAACAAGACTGATAGCTAC	0	5
bge_tophit8911	CGCATGGGGTCGCGGGTTCCA	13	0
bge_tophit1724	AGACCTGAAGATGGACTCTT	0	101
bge_tophit9530	ATAGGAACATAAGTAGAAGG	0	12
bge_tophit9531	ATAATTAGGATTGGAAAAAA	0	12
bge_tophit9532	AAATGGAATTCAAGCAGATA	0	12
bge_tophit9539	ATAGCAGGTTGGAAGAATTC	0	12
bge_tophit1096	AAAAAAGGGCGGCGACTTACT	175	0
bge_tophit1099	TATAGGAACATAAGTAGAAG	174	0
bge_tophit9398	AGGAATAGAATTGGCAGATA	12	0
bge_tophit9399	ATTCTATAGTTCGTGGGACC	12	0
bge_tophit16278	ATTTAAAATAGGAGCAGAAC	6	0
bge_tophit19225	ATAAGCAAGCCAGGACTCCA	5	0
bge_tophit6159	AATAGGAATAGTAGAAGACA	0	21
bge_tophit16345	TCATAAGAGTTGGAGCAGAGG	6	0
bge_tophit16346	AGACCTGAAGAGGGACTCTTA	6	0
bge_tophit16342	AGATACGGCTTTAGAAGAGGA	6	0
bge_tophit16343	AAATTTATTATAGCGGACGCC	6	0
bge_tophit16618	ATTCACGCGGAGAGAAAGGGATT	0	6
bge_tophit15868	TAAAATTTAAAGAAGAATATAT	6	0
bge_tophit19965	ATAGCAGGTTGGAAGAACAA	0	5
bge_tophit19969	ACTAGGGGAGGGAGCAAACG	0	5
bge_tophit4421	AAAAGGAATGTACGGAATGA	0	32
bge_tophit19982	GAATCGGTAAAAGCAAGACA	0	5
bge_tophit2700	ATGATAGAAAAGCTGGCAGTA	0	59
bge_tophit10128	AAATGGAATTCAAGCAGATAT	11	0
bge_tophit10126	AGAGTGGACAATTAACAGAAG	11	0
bge_tophit10127	TAATAGAACTCCAAGTGGATT	11	0
bge_tophit10125	AGAAACGGAATGGAGATAATG	11	10
bge_tophit16114	ATAGGGATAGGAACAGCGGA	6	0
bge_tophit19140	AAAAGCGAGAAACGGGAACC	5	0
bge_tophit11834	ACTGTAAGAACCGGATTCTAT	9	0
bge_tophit11832	ACTGAAAGCTGCAATAGGACA	9	0
bge_tophit18084	ATTATGATAGAAAAGCTGGCAGA	5	0
bge_tophit12873	ATTGATTGTGGATGTCGGTCC	8	0
bge_tophit12875	ATGATAGAAAAGCCGGCAGAA	8	0
bge_tophit16386	AAGGACTCATGAATGCAGAAA	6	0
bge_tophit6708	AAAATTTATTATAGCGGACG	0	19
bge_tophit6704	TGTAGATGGATCAGTAGAAG	0	19
bge_tophit6705	TGATTGGGGAGATGACTTTA	0	19
bge_tophit5613	AAATTTATTATAGCGGACGTAGT	23	0
bge_tophit2493	TGTAATTTAAATAATTATTGAT	64	0
bge_tophit16159	AGAGTTGGAGCAGAGGTTAA	6	0
bge_tophit16404	ATGATAGAAAAGCTGGCAGCA	6	0
bge_tophit16151	AAAACATTGTAGAAGAAGTA	6	0
bge_tophit16150	AATAGCGTGAGGGGGATTTG	6	0
bge_tophit16155	TTCAGGAGATATAGATACTT	6	0
bge_tophit16156	ACATAAGATTGTGCAGAAGA	6	0
bge_tophit19443	TTGAACGGCAAGCAGAATTAT	5	0
bge_tophit11751	GAAGGTGGGGACGACGTCAA	9	0
bge_tophit6110	ATACAGAATTCGGAATATCTA	21	0
bge_tophit7614	AGGCTCGTAGCTCAGACGGTT	16	0
bge_tophit3623	AGGTGGAATGGGAGGAATGA	0	41
bge_tophit3621	GATTGATTTGTGTATGGACC	0	41
bge_tophit149	ATGATAGAAAAGCTGGCAGAA	2141	1561
bge_tophit19322	TATTGCTAATAGGATCGTAG	5	0
bge_tophit19321	ATTGCGATCGTACGGGTTCC	5	0
bge_tophit19533	AGAGTGAATTTTGGCGGATTA	5	0
bge_tophit1914	AAAAAAGGCACAGAGCGGAACC	89	0
bge_tophit4392	TGTAGAATTAGAGCACAAGA	32	0
bge_tophit19327	AAAACGGATTGGGGATGACG	5	0
bge_tophit4395	ATTGGGGCAGATGGAATCAT	32	0
bge_tophit8938	TTTTGGATATAGAATACGGATA	13	0
bge_tophit19561	AGAAGGAGAAGGAGGTAGGCG	5	0
bge_tophit19560	AGGAGGAGTAGGAAATAGAGG	5	0
bge_tophit12897	AAGCGGAGAGAAAGGGATTCG	8	5
bge_tophit5113	AGGAGGAGGTGGAATGGGAGGAA	26	0
bge_tophit6942	TTGTTTGATTATTGAACGGCA	18	0
bge_tophit6946	CGATTAGGCTAGAAGCTTTCC	18	0
bge_tophit16368	TTATGTATTAGCAGGAAGACA	6	0
bge_tophit9418	AAAAAAGGACTTGAATGGCT	12	0
bge_tophit12841	AGTTAAAGATCCACTAGACG	8	0
bge_tophit4359	AGAAGACTTTTGATCATGAATTG	32	0
bge_tophit17418	CGTTTGGCAAGATAGACGGACA	5	0
bge_tophit7268	ACAATGGAAGAGGGGACTGTA	17	10
bge_tophit7267	TGACTGTAGATCGTATGGGTA	17	0
bge_tophit7265	ACTAAAGGATTCGCATAGACG	17	0
bge_tophit11867	AAAAAAGGGCGGAGACTTACT	9	0
bge_tophit556	TTATAGGAACATAAGTAGAAG	399	384
bge_tophit551	TGATGAAATAGAACCAGAAG	402	0
bge_tophit14139	AGAGTTCGTTTGGTCGGTGA	7	0
bge_tophit14140	TTTAAGGGTCGTTGCAGATG	7	0
bge_tophit19583	ATTTTGGAATTGGGGCAGGTG	5	0
bge_tophit19317	AGAATTTAAATCGGATATAC	5	0
bge_tophit19207	GAGCAGGAGGAGGTGGAATG	5	0
bge_tophit12912	ATACAGGAACAGATACAGACG	8	0
bge_tophit11819	AGATCAAGATTCTGATTACA	9	0
bge_tophit11810	AATAATAGTTGGAGGAGGAA	9	0
bge_tophit11817	AGCTGTATTATGCGAATTCG	9	0
bge_tophit11816	GATTGGAGCGGGAGGGACCAAGG	9	0
bge_tophit19587	GGAATTGAACCCGCGGCCCCG	5	0
bge_tophit19009	TAAAGCGGAGAGAAAGGGATAA	5	0
bge_tophit14365	GATTAAAGCAGAACCTGCAGG	7	0
bge_tophit8899	AGAATGCGGTCTGGACGGGAC	13	0
bge_tophit4989	CTGTGTAGAATTTGCAGAAA	27	0
bge_tophit5635	AATAGCGTGAGGGGGATTTGA	23	0
bge_tophit5634	AGAAGGACATACTGCTCACC	23	0
bge_tophit5633	AAAATCAGAAAGACTAGTCA	23	0
bge_tophit5631	AAAATCAGAAACCGGGCTAC	23	0
bge_tophit16237	AAAAAAGCTTCTAGACCTGA	6	0
bge_tophit19588	ACTCCGGCAACTCTCCCCAAG	5	0
bge_tophit19122	AAAGTAAATCGGAGGCTACA	5	0
bge_tophit16131	TGGAAGGTAGCAGAACGTGC	6	0
bge_tophit16137	GATGAAATAGAACCAGAAGT	6	0
bge_tophit19125	CGAACCTGTAACCGACTGCT	5	0
bge_tophit3297	AATTTCATTGACTGTCGATC	46	0
bge_tophit3296	TTAAAGCGGAGAGAAAGGGA	46	0
bge_tophit3294	TCGATTAGGCTAGAAGCTTT	46	0
bge_tophit3293	CATATTAGAGTCGTCACACA	46	0
bge_tophit3298	ACTTTCATTGATAGCAGGACG	46	10
bge_tophit5969	AAAAAAGCTTATAGACCTGATG	0	22
bge_tophit3749	AAAAAGGGCGGCGACTTACC	39	0
bge_tophit3748	AAAAAGAATCGGAGGATACC	39	0
bge_tophit7672	AATGCGGGCGAGAAACCCGCAC	16	0
bge_tophit304	GATTGGAGCGGGAGGGACCACGG	850	0
bge_tophit13209	ATTAAAGCGGAGAGAAAGTTAT	0	8
bge_tophit19601	TAATCTGTATGAAGAATGGAT	5	0
bge_tophit3607	AGAAAAAAGAATCGGAGGATA	41	0
bge_tophit3608	ATGACGGGAACAGCAGAAACA	41	0
bge_tophit10863	AAAGGGACTATACGACATAG	10	0
bge_tophit10866	ACTATAAATAGTCGGATGTT	10	0
bge_tophit10864	TTAAAATAGGAGCAGAATTA	10	0
bge_tophit20785	ACAAGCGGAAAGATCAGGAGAC	0	5
bge_tophit4219	TTTTAAAATGCAAGACGGATA	34	8
bge_tophit4214	TAAAAGCCTTTGTAGACGCA	34	0
bge_tophit4212	AGACTGAAAGAACAGCATAC	34	0
bge_tophit4213	AGAATAAGCAAGCCAGGACT	34	0
bge_tophit4210	TATACGAAGATCGGGAAATA	34	0
bge_tophit10685	AAATCCAACAGAAGCAGAATTTC	10	0
bge_tophit14302	AGGATGAAAACCTGACGTCC	7	0
bge_tophit16405	TTACTTTAGATCTCACAGAAG	6	0
bge_tophit16976	TGAGATATTAATTTGGGTTTTT	0	6
bge_tophit13084	ATAGAAGAAGCTACATATAGTGC	0	8
bge_tophit9488	AAATGCAGAATTAGATGGACA	12	0
bge_tophit9489	TCATACGCAATGGATCGTCCA	12	0
bge_tophit9480	ACACCCATAGAAGCTGGATTA	12	0
bge_tophit9481	CGCATGGGGTCGCGGGTTCAA	12	0
bge_tophit3196	TTGAATTTAAATAATTATTGAG	48	0
bge_tophit9483	TGTGATCAAAGACGCAGAAAC	12	0
bge_tophit9487	AAAAGGGACTATACGACATAG	12	0
bge_tophit16308	ATGATTGCAAGAAGAATTCG	6	0
bge_tophit18268	AGATAGGATAGGAAGACGGCGGA	5	0
bge_tophit12771	AAATAAATCGGGGTGACTGG	8	0
bge_tophit12770	TTTAACTCATTGGGCAGAAC	8	0
bge_tophit6111	TTATAGGAAAATAAGTAGAAG	21	7
bge_tophit19543	AGACTGCAAAGGATGCAACCA	5	0
bge_tophit7240	ATACTGAAGGACGTTCTAGT	17	0
bge_tophit7243	GAACTCGTCATACTAATAGCA	17	0
bge_tophit19167	TCCTGGCATTGAAGGGACTG	5	0
bge_tophit14152	AGAAAGACTAGTCAAGGACG	7	0
bge_tophit14151	ACCTGTATCGTAAACGGACG	7	0
bge_tophit13439	AGATACGGCTTTAGAAGTCGTA	7	0
bge_tophit19404	TAAAGCAGATCGTTATGGAA	5	0
bge_tophit19163	TCTCCAGGAGTAGCAGAACC	5	0
bge_tophit19409	AGTTTATAATAAGGATTGTT	5	0
bge_tophit14206	AAAAAGGAGGAAGAGGATGC	7	0
bge_tophit8874	AAAATGATTCGGAAGCAGAA	13	0
bge_tophit8873	GAATTGGGGCAGATGGAATC	13	0
bge_tophit17196	ATTAAAGCGGATAGAAAGGGATT	0	6
bge_tophit8878	AAATCAGAATCCAGACTTAC	13	0
bge_tophit8879	GCTGTTCGTTTAGGAGGAAG	13	0
bge_tophit11794	AAGTAGCGGAATAGGAATAG	9	0
bge_tophit2104	ATTATGCTTGGACGGCAGAAG	80	7
bge_tophit19107	ATAATGTCTGGAATAGGTTG	5	0
bge_tophit19106	AATATTATACGGAACGGACA	5	0
bge_tophit14185	TGGAGGAATTATAGACGATT	7	0
bge_tophit14186	ATTAAAGCAGAACCTGCAGG	7	0
bge_tophit15368	CATAAAAAAGCTTATAGACCTGA	6	0
bge_tophit4234	TTAGAGCGTTGGATTCATAC	0	34
bge_tophit4236	AGAATGCGGTCTGGACGGGTT	0	34
bge_tophit2684	GAAACAAGTTTCGATTGGACG	59	10
bge_tophit2683	TGATTGGGGAGATGACTTTA	59	0
bge_tophit2682	AAAAAAGGCACAGAGCGGAA	59	0
bge_tophit1956	AGACCTGAAGATGGACTCTTA	87	0
bge_tophit1489	ATCAGTCTCGTAGCTCAGACGG	77	122
bge_tophit20038	AGTAGGACTATAAGCCGGAC	0	5
bge_tophit12916	CGAACCGGCGACCCTCAGACC	8	0
bge_tophit14363	AAATACGAACTCCTAGGGATA	7	7
bge_tophit5339	GGTAGAGCGTTGGATTCATA	0	25
bge_tophit20036	AGATGAGGAATAGTGCAACA	0	5
bge_tophit11946	TATTGGACAGGCAGAAATCA	0	9
bge_tophit5489	TCATACGCAATGGATCGTCA	0	24
bge_tophit12832	CACCGGAACTTGCAGCAGAT	8	0
bge_tophit16328	CTTCTATAATGGGATTGTAA	6	0
bge_tophit1301	ATAGAAAAGCTGGCAGAACA	143	0
bge_tophit10895	CATAAATGGAGGGCTGAAGA	10	0
bge_tophit7222	AGTATGGAAAAGAGCTGAAG	17	0
bge_tophit7223	AATATTGTAGCTGGAAGCAT	17	0
bge_tophit7220	AATACAGAATCCGGCTTATA	17	0
bge_tophit7225	ATTGGGATTCTGGAGAAGAC	17	0
bge_tophit7229	CTGTGTTGGAGGAGGACGTC	17	0
bge_tophit10987	AAAAAGCATAGACGGAAAACCA	10	0
bge_tophit11727	AAATACAGAATCCGGCTTAT	9	0
bge_tophit13043	AAGAAGGAGGACGACACACT	0	8
bge_tophit19495	TCATACGCAATGGATCGTCAC	5	0
bge_tophit10981	AAAAAGATCGTGTAGATGACG	10	0
bge_tophit10982	AGGATAGAAAAGCTGGCAGGA	10	0
bge_tophit3410	AAATTTTGTAGCGACAGACA	44	0
bge_tophit8851	ATACAGAATTCGGAATATCT	13	0
bge_tophit8852	ACAAGCAGATACGGGGACGA	13	0
bge_tophit8856	ATTAAAGAAACGGCTAGACG	13	0
bge_tophit8859	AATTCTAGTAGAAGCCGTTA	13	0
bge_tophit12766	CATAAGATTGTGCAGAAGAA	8	0
bge_tophit12767	TTGTTACGACGGCCTCCTGG	8	0
bge_tophit12765	TCTGGGAAAGGAGGGACTTG	8	0
bge_tophit12760	TGGGATCAAAGACGCAGAAA	8	0
bge_tophit12761	ATGTAGAATAGGAATCAAAT	8	0
bge_tophit20179	AAAATACAGAATTCGGACTAC	0	5
bge_tophit19356	ATTTGAACCAGCGACTCCCT	5	0
bge_tophit6099	TGTTTGATTATTGAACGGCA	21	0
bge_tophit6093	AAATCCCGTCCAGACCGCCA	21	0
bge_tophit6091	ACTAACTAATCGGACGCACG	21	0
bge_tophit7417	ACTATAGAAGGAGTAGTAGAAGA	0	17
bge_tophit5929	AATAGGAGCAGAATTAACAA	0	22
bge_tophit3785	TTATAGGAACATAAGGAGAAG	0	39
bge_tophit16464	AATGAGGAAAACGGAACTACA	6	0
bge_tophit16469	AATTTAAAATAGGAGCAGAAC	6	0
bge_tophit4783	ATTGTACCCACGACTGGATT	0	29
bge_tophit1977	AAAAAAGAATCGGAGGATAA	86	0
bge_tophit701	AAATACAGAATTCGGAATAC	295	0
bge_tophit703	AAAGCGGAGAGAAAGGGATT	0	294
bge_tophit8437	AGGATGCGTTCGAGATGTAA	0	14
bge_tophit14341	AGAGATTGGAGAGCAGGAAGA	7	0
bge_tophit17760	TGGAAAATGGAATTCAAGCAGAT	5	0
bge_tophit11954	AAATGTGATAGTGGGGCATA	0	9
bge_tophit19466	TCGTACTGGAAGGGCAGGTAA	5	0
bge_tophit17621	CATAAAAACGCTTCTAGACCTGA	5	0
bge_tophit8335	AAGCAGAATTAACTCTAACC	14	0
bge_tophit8336	AAAGGCACAGAGCGGAATCG	14	0
bge_tophit8331	AAGGCGGTCTGGACGGGATT	14	0
bge_tophit8330	AAAATAGAACTCTACGTAAC	14	0
bge_tophit8333	AAGCCTTTGTAGACGCAACC	14	0
bge_tophit8339	AGCAGAAATCGGAGAACCCA	14	0
bge_tophit13378	CGGCTTTAGAAGAGGCTCGGAG	7	0
bge_tophit3896	ATTGACGGGGGCCCGCACAAGCG	37	0
bge_tophit17616	GCGAGGCTTGTCTTTATGACGGC	5	0
bge_tophit2318	TTGTTACGACGGCCTCCTGGTAG	70	0
bge_tophit1367	TGTAGATGGATCAGTAGAAG	137	0
bge_tophit1369	TGATGAAATAGAACCAGAAG	0	137
bge_tophit16872	TCGGTTAGGCTAGAAGCTTTC	0	6
bge_tophit16708	ATAGGATGCATGATGTTCTG	0	6
bge_tophit16704	AAAAAGCGAGAAACGGGAAT	0	6
bge_tophit16706	ATAAAACCTATCAGAGGACG	0	6
bge_tophit16700	TTTAAAATAGGAGCAGAATT	0	6
bge_tophit16703	AAATTTATTGCCGGATTTTT	0	6
bge_tophit7758	ATTAAAGCGCAGAGAAAGGGAT	0	16
bge_tophit19104	TGGAGAATTAGAGCACAAGA	5	0
bge_tophit19476	TTTGAACGTATTGTAGCAGAA	5	0
bge_tophit19470	CAAGGAGGAACAGAAAACATA	5	0
bge_tophit3431	GAATAGCAAGTAGAAACTCA	0	44
bge_tophit19108	GCTGTAATTGCTGCAGAATG	5	0
bge_tophit19611	AGCTCCTATAAGTCGGCTTAC	5	0
bge_tophit14352	TTTTGGATCGCTCGGCAACGA	7	0
bge_tophit1567	CGATTAGGCTAGAAGCTTTC	114	0
bge_tophit2142	AGATATCAAACGTCGGCATTT	78	0
bge_tophit9788	TGAAGTAGAAGGATTACAGACA	11	6
bge_tophit3239	ATAGGGGCTTTAGGTGGAGGGAT	47	13
bge_tophit5696	AGGAAGGTGGGGACGACGTCA	20	23
bge_tophit5691	TAGTTTTGTTTTGTCGGATA	0	23
bge_tophit5692	ATGATAGAACAGCTGGCAGAA	6	23
bge_tophit6342	TCTGTAGAATAAATAGGAAG	20	0
bge_tophit6341	AAACAGACGTATTGAATATT	20	0
bge_tophit6346	CATGTAGAATTAGAGCACAAG	20	0
bge_tophit6345	ATTATACGGAACGGACATAA	20	0
bge_tophit6349	AGATATAGAATGAGCAGGAAG	20	0
bge_tophit12138	AGACGGCTTTTTGAAAATGATT	8	0
bge_tophit13816	GCCAGGAGCAGGAGGAGGTGGAA	7	0
bge_tophit19284	AATGAGGAAAACGGAACTAC	5	0
bge_tophit16403	ACGCGACCTCGAAGGGACTCG	6	0
bge_tophit726	CTATGGAAAAGTAGCAGAATT	282	222
bge_tophit16401	AGGTGGATCTGAAGCGGCTAT	6	0
bge_tophit3662	AAATTTATTATAGCGGACGGAG	40	0
bge_tophit12900	TCCAACAGAAGCAGAATTTCG	8	0
bge_tophit4862	ACCGGGGGGTAGGCAGATAG	28	0
bge_tophit4867	AGGAGGAGGTGGAATGGGAG	28	0
bge_tophit4868	TTTTGCGGAGAGAGAGGGAT	28	0
bge_tophit9491	ATTATGGGTGGTTATAGCAAT	12	5
bge_tophit9490	ATTTAAAATAGGAGCAGAATT	12	0
bge_tophit16236	ACTTAGTAGCTAGAAGAACG	6	0
bge_tophit2081	AAAAACCTCTTGAGATCAAGAGG	5	81
bge_tophit16814	AGAAGGATTGCTTTAGGAATA	0	6
bge_tophit10113	AAAAAACGAACTCCTAGAGA	11	0
bge_tophit7598	TCCTGAAGAACGAGCTATTT	16	0
bge_tophit7595	AGAAACGGAAGAACTTGTAC	16	0
bge_tophit7591	AGATGGATCAGTAGAAGCCA	16	0
bge_tophit7592	AAAGGAAGAGGTACTTGATA	16	0
bge_tophit11789	AGTTGGAACTGGAGGTCATA	9	0
bge_tophit11788	AAATAGAATCTGAATTCGGC	9	0
bge_tophit10118	TGATGAAATAGAACCAGAAGC	11	0
bge_tophit10945	ATAGAAAAGCTGGCAGAACC	10	0
bge_tophit10946	GCTAAAAAACTGGGACGTCA	10	0
bge_tophit10947	ATGGGGCGGCTATGACTGCA	10	0
bge_tophit10940	ACCGGATTCGAACCGGCGCC	10	0
bge_tophit10941	AGCTGACGTAATGACTATGG	10	0
bge_tophit10942	AGGAATTGACATAGACGACA	10	0
bge_tophit10948	AGGATTTCAAACAGCAGAATT	10	0
bge_tophit19639	AGTCTCGTAGCTCAGACGGTA	5	0
bge_tophit19634	TGAGGAGTAGGAGCCAACACA	5	0
bge_tophit19631	AACCGTGGGCAATACTGGATT	5	0
bge_tophit19632	AAATATTATACGGAACGGACA	5	0
bge_tophit19119	CAGAATGCGGTCTGGACGGG	5	0
bge_tophit16246	AAAATGATTGGGATGGATGG	6	0
bge_tophit2855	TTTGAACGTATTGTAGCAGG	55	0
bge_tophit12726	TCAAGTGGAGCAGGAGGACA	8	0
bge_tophit12725	TCATTGATAGCAGGACGTAT	8	0
bge_tophit16563	ATATGATTGCAAGAAGAATTCG	6	0
bge_tophit6933	GGCTCAGGATGAACGCTGGCGGC	18	0
bge_tophit18669	TGGAATTTAAAAAAGAATGAAG	5	0
bge_tophit16442	AGATCCTGTATGCATATGAAA	6	0
bge_tophit20259	ATTGGGGCAGATGGAATCTTT	0	5
bge_tophit14548	AAATAAATCGGGGTGACTGG	0	7
bge_tophit16440	AAAGATCGTACTGGAATAGGG	6	0
bge_tophit4294	ATGTGGATGGTTGGATTTAA	33	0
bge_tophit4295	AGGTGGAATGGGAGGAATGA	33	0
bge_tophit4290	TAAAAAACTGGGACGTCATA	33	0
bge_tophit4291	GCTGGATTTTTAGCAAGACG	33	0
bge_tophit2621	GTATGGAAAAGAGCTGAAGA	0	61
bge_tophit20027	TAAACCAGACGGGCATAGTG	0	5
bge_tophit2994	CAAATTTTGTAGCGACAGACA	52	0
bge_tophit8378	GTTTAAAAGGAATTCCAGAAG	14	0
bge_tophit8372	AAAATGATTCGGAAGCAGACA	14	0
bge_tophit8377	AGACTGCAAAGGATGCAAACA	14	0
bge_tophit8376	AGCAGAAGAACTAGTTGATAC	14	0
bge_tophit14388	AAAATCAGAAACCGGGCTACC	7	0
bge_tophit14385	CTAAAAAACTGGGACGTCATA	7	0
bge_tophit14382	CATTAAAAGACGCTGCCGACC	7	0
bge_tophit7237	AAAAGCTTCTAGACCTGATG	17	0
bge_tophit7236	AGCGGCATAAGCTCCAGACC	17	0
bge_tophit12849	TGTGGGGGAAGTCGGGTCAT	8	0
bge_tophit19422	GGAATAGTAGAAGACATATA	5	0
bge_tophit12848	CTTTCATTGATAGCAGGACG	8	0
bge_tophit7238	AGAAGAAGTAGATATCCATA	17	0
bge_tophit9354	TGGAATGAAAATAAGTATTGAG	12	0
bge_tophit19213	ACCCGGGTGGTGGAATTGGT	5	0
bge_tophit16294	AAGAAGCAGTAGAATGCATT	6	0
bge_tophit16293	TAAATCAGAATCCAGACTTA	6	0
bge_tophit7576	CGAACCGGCGACCCTCAGAC	16	0
bge_tophit7572	CATAAGAGTTGGAGCAGAGG	16	0
bge_tophit7571	AAAAGGCACAGAGCGGAATC	16	0
bge_tophit12821	TTGATTGGGGAGATGACTTT	8	0
bge_tophit7579	AAAAGGCACAGAGCGGAACC	16	0
bge_tophit16746	TTAAAGCGGAGAGAAAGGTTT	0	6
bge_tophit19911	TCAACAAGCAGATACGGGGTCTA	0	5
bge_tophit10071	CATTTGGATAGATGGACACC	11	0
bge_tophit10966	ATGTAGAATTAGAGCACAAGA	10	0
bge_tophit10964	CAGTCGCTTTAGAAGGAGCTT	10	0
bge_tophit10965	TAAATCAGACAACAAAGGACG	10	7
bge_tophit10960	AAAAGGAAGAGGTACTTGATA	10	0
bge_tophit10073	TGAAAAATCATGCACGGACG	11	0
bge_tophit10077	GTGATCAAAGACGCAGAAAA	11	0
bge_tophit3477	AGAAGGAGGACGACACACTC	43	0
bge_tophit3478	TCGAGAGGAAGGTGGGGACG	43	0
bge_tophit19295	AAAATGCAAGACGGATATTT	5	0
bge_tophit19385	AGATGAAGGGACAGGGATTG	5	0
bge_tophit19388	AATAGCAGATTTTCCGGACA	5	0
bge_tophit20069	AGGATGAAAACCTGACGTCC	0	5
bge_tophit20061	CTGATAAGTAGGAGAAGGTA	0	5
bge_tophit19558	AGATGAGGAATAGTGCAACAG	5	0
bge_tophit12524	ACAAAGGAAGAAGGAGGACGACA	8	0
bge_tophit19971	AGATACGGCTTTAGAAGATT	0	5
bge_tophit5528	ATAAAAAAGCTTCTAGACTTGAT	0	24
bge_tophit7961	GGAATAGAATTGGCAGATAA	15	0
bge_tophit7960	AAAGCGAGAAACGGGAATTG	15	0
bge_tophit7963	AATTGGGATTCTGGAGAAGA	15	0
bge_tophit7962	ACAAGGAGGAACAGAAAACA	15	0
bge_tophit7965	ATAGGAACATAAGTAGAAGG	15	0
bge_tophit7964	TTTGCGGAGAGAGAGGGATT	15	0
bge_tophit14547	AGAAGGAGGACGACACACTC	0	7
bge_tophit16198	TAAAGAGCAGCTAGAAGATG	6	0
bge_tophit5154	AGAAGGAGGACGACACACCA	26	0
bge_tophit2609	ACGACGGCCTCCTGGTAGAGAA	61	0
bge_tophit13024	CGAACCTGTAACCGACTGCT	0	8
bge_tophit13025	ATTGGGTGGACGACCGGATT	0	8
bge_tophit13020	CGATTAGGATGTGCTGGTTC	0	8
bge_tophit8353	GAGCGGGAGGGACCACGGGG	14	0
bge_tophit8352	AAAAGAAAATGCAGAACACG	14	0
bge_tophit8359	AAGGAAAAGGAACAGCAGAT	14	0
bge_tophit19487	AAAATGAGGAAAGACCGGACA	5	0
bge_tophit6929	GTACGCGACCTCGAAGGGACT	18	0
bge_tophit6921	ACACCCAGTAGAAGCAGATG	18	0
bge_tophit18174	ATTAAAGCGAAGAGAAAGGGATT	5	0
bge_tophit6924	AGAAATGAATGCAGAACACC	18	0
bge_tophit6925	ATAATTAGGATTGGAAAAAA	18	0
bge_tophit2040	AGCAGAAGAACTAGTTGATA	83	0
bge_tophit12884	TATGGAAAAGTAGCAGAATTA	8	0
bge_tophit12880	CTATTAGCATAGCCGGACGTT	8	0
bge_tophit6609	AAGGAAGAAGGAGGACGACA	19	0
bge_tophit9400	ATAACGGGAGAAGGGCATAC	12	0
bge_tophit9401	AAATCAAGTAGGGACACTCA	12	0
bge_tophit9403	AAAATCATGCACGGACGGTA	12	0
bge_tophit9406	TCATAAATAGCGGCAACTAA	12	0
bge_tophit1385	AAAGCGGAGAGAAAGGGATT	134	0
bge_tophit1383	CAATGCATACTGACGGAACA	134	0
bge_tophit16505	CAATGACAGAAGCTGTAACTCC	6	0
bge_tophit227	TCGATTAGGCTAGAAGCTTTCT	1178	1009
bge_tophit11769	CGGAAGAAAACAGAGTGATA	9	0
bge_tophit10908	ATTATGCTTGGACGGCAGAC	10	0
bge_tophit10909	TCCGGCAAATATAGAACAAG	10	0
bge_tophit19416	ATAAATAAGAAGGGATGGTA	5	0
bge_tophit19411	ATACTGAAGGACGTTCTAGC	5	0
bge_tophit19412	GTTCTGAGGGTCGCCGGTTC	5	0
bge_tophit10900	CGAGCACGGATATCGCATTA	10	0
bge_tophit10902	AGCTAGAAGACTCAATTTAG	10	0
bge_tophit10903	GCTAAAGTGCGGGCGAAGGG	10	0
bge_tophit10905	TGATGTTGTAGATGAAGCCG	10	0
bge_tophit596	AAAAAAGGCACAGAGCGGAATCG	181	368
bge_tophit11234	AGAATGTTGGCATCCATAGACA	9	0
bge_tophit20045	AGAAGAGCATCTGTTTCACA	0	5
bge_tophit20040	AGCTGGAGTAGGCATTGTAA	0	5
bge_tophit12802	ATTATTGGAGGAGGAGCTAC	8	0
bge_tophit2814	AACAGAATGCGGTCTGGACG	56	0
bge_tophit2815	AGAAATGAATGCAGAACAGC	56	0
bge_tophit11502	AAGCACGTTTAGAACTAGGTTT	9	0
bge_tophit4143	ATAGCGTGAGGGGGATTTGA	0	35
bge_tophit12800	AAAAAAGAGATAGAGGGACA	8	0
bge_tophit7942	AAATTAACGGCAGAAGATAT	15	0
bge_tophit7947	GCTCAGGATGAACGCTAGCGGCG	15	0
bge_tophit7944	AAGCAGAACTCCAATCTGAC	15	0
bge_tophit18346	TAAAATTTAAAGAAGAATGTAG	5	0
bge_tophit1045	AGCTGACGTAATGACTATTG	0	184
bge_tophit7624	TGTTCTCACTGCAGAAGAACA	16	8
bge_tophit7622	ATGATAGAAAAGCAGGCAGAA	16	0
bge_tophit7620	AGAATCGGTAAAAGCAAGACA	16	0
bge_tophit20068	AATAGCATCTACGGATTCTA	0	5
bge_tophit10102	ATAGGATGCATGATGTTCTG	11	0
bge_tophit5035	AGACTGCAAAGGATGCAAAG	0	27
bge_tophit19524	AGATAGGATAGGAAGACGACC	5	0
bge_tophit5030	AAAGGAATTGACATAGACGACA	27	0
bge_tophit3828	TGACGGGAACAGCAGAAACA	38	0
bge_tophit3829	AACAAGCAGATACGGGGACT	38	0
bge_tophit13042	ATGGAATAGAATATGCAGAA	0	8
bge_tophit8332	GGGATCTGATTAGCATGAAG	14	0
bge_tophit13044	AGGCGGTCTGGACGGGATTT	0	8
bge_tophit13046	CTATGGAAAAGTAGCAGAAA	0	8
bge_tophit13047	AAGTGGAGCAGGAGGACAAA	0	8
bge_tophit14920	CGGGGTGTAGCGCAGATTGGTT	6	0
bge_tophit19198	AAATACAGAATTCGGAATAT	5	0
bge_tophit5283	AGAAACGGAAGAACTTGTAT	25	0
bge_tophit5281	AGGATGCGTTCGAGATGTAA	25	0
bge_tophit5286	CTTCCTATTTCTGCAGAGGCA	25	0
bge_tophit5287	AAACAGACGTATTGAATATTT	25	0
bge_tophit2393	TCTTGTATTGGACAGGCAGAAA	67	5
bge_tophit16227	TCTGCATGGCCTGGAGAAAA	6	0
bge_tophit9287	TTGTTGGAAATAAAGGAAGACG	12	0
bge_tophit10103	ACCTTAGAAGAAGTCGGACA	11	0
bge_tophit11797	GAATGCGGTCTGGACGGGAT	9	0
bge_tophit6223	ATTAGCAGGAGGAGTAGCAGTC	0	21
bge_tophit11791	AAAAAGCAGAATTAACTCTA	9	0
bge_tophit11781	AGGAGGATTATATTTATTTG	9	0
bge_tophit11783	ATCATAACAGGTTCAGGACG	9	0
bge_tophit11785	TGGTAGAAAAGCTGGCAGAA	9	0
bge_tophit10920	AGAAACCGGGCTACTCTTAC	10	0
bge_tophit10924	TAGAGAGCAGAGGACTTATT	10	0
bge_tophit10928	ATTGTACCCACGACTGGCTT	10	0
bge_tophit17405	ACTGGTACCAGCAGTAGAAACG	5	0
bge_tophit16782	TGGCATTGAAGGGACTGCATT	5	6
bge_tophit14193	AGTCGCTTTAGAAGGAGCTT	7	0
bge_tophit20021	CATATTAGAGTCGTCACACA	0	5
bge_tophit19092	AGAAGGAATATATGAACACC	5	0
bge_tophit20026	AAAGTAGTTGAAGATTCTGG	0	5
bge_tophit20028	AATCAGTAGACCAAGACATT	0	5
bge_tophit10078	CCGATAGGGACCCAGGGACA	11	0
bge_tophit13787	AGTAAAGCGGAGAGAAAGGGATT	7	0
bge_tophit19980	ATGTAGAATAGGAATCAAAC	0	5
bge_tophit19569	TCATTGCGATCGTACGGGTTC	5	0
bge_tophit12781	TAAATAGGGCATAGATTGAT	8	0
bge_tophit12782	AGTAGCGGAATAGGAATAGC	8	0
bge_tophit12784	ATTAAAGCGGAGAGAAAGGG	8	0
bge_tophit12785	TGAATCAATTGTGGGAGACG	8	0
bge_tophit12786	TATCTGCAGATATAGGCATT	8	0
bge_tophit12787	CTGAAAGCTGCAATAGGACA	8	0
bge_tophit18322	TTTGTTGTTACGACGGCCTCCTG	5	0
bge_tophit943	TTTTGGAATTGGGGCAGATG	206	0
bge_tophit942	AGATACGGCTTTAGAAGAGG	206	0
bge_tophit2230	AAATACAGAATTCGGAATATCT	74	0
bge_tophit20018	CCAACTGAGCTATGGGACCA	0	5
bge_tophit2643	TGTGATCAAAGACGCAGAAA	60	0
bge_tophit7936	AGTAGAACAAATGCCGGTCA	15	0
bge_tophit7937	AGCAGATACGGGGACTAAAA	15	0
bge_tophit7934	CATTAAAAGACGCTGCCGAC	15	0
bge_tophit20497	ATAGGACAAGATGAAGCAGTAG	0	5
bge_tophit19962	ATTATACGGAACGGACATAA	0	5
bge_tophit7071	AAAAACCTCTTGATCTCAAGAGG	0	18
